# Supplementary material for: Fluorine substituent effects on dihydrogen bonding of transition metal hydrides
Source: Royal Society of Chemistry journal article supplement (doi:10.1039/b900287a), 2009-01-01
Supplement: b900287a.pdf [file b900287a.pdf]

Supplementary Material (ESI) for *PCCP*

This journal is © the Owner Societies 2009

Fluorine Substituent Effects on Dihydrogen Bonding of Transition Metal Hydrides

Heiko Jacobsen

Supplementary Material

**NET<sub>3</sub>**

BP86/N/n.log

Route: #P BP86/Gen/Auto Opt Freq GFInput

Atom Coordinates (x,y,z) in Angstrom

```

-----
N    0.000010  -0.298169  -0.031212
C   -1.218703  -1.085014   0.193208
C    0.000013   0.992273   0.691099
C    1.218730  -1.085009   0.193192
C   -0.000055   2.211593  -0.234761
H    0.893874   2.212604  -0.890611
H   -0.893938   2.212483  -0.890673
H   -0.000146   3.154268   0.354077
H   -0.880098   1.037525   1.365956
H    0.880204   1.037565   1.365841
C    2.473228  -0.445405  -0.401860
H    3.349737  -1.109838  -0.253102
H    2.344879  -0.267072  -1.488867
H    2.713309   0.525348   0.078907
H    1.386200  -1.289066   1.283029
H    1.059303  -2.071847  -0.280124
C   -2.473218  -0.445458  -0.401859
H   -3.349778  -1.109738  -0.252717
H   -2.713103   0.525486   0.078617
H   -2.345042  -0.267522  -1.488952
H   -1.059260  -2.071866  -0.280073
H   -1.386177  -1.289033   1.283053
-----

```

```

Energy E(RB-P86)  -292.35270878 a.u.
                  -767572.04 kJ/mol

```

SCF Convergence: 0.4632D-09

&lt;S\*\*2&gt;: 0.0000

Charge: 0.0000

Maximum Force: 0.000027

```

ZPE-correction   :           0.197909 a.u.
                  519.61 kJ/mol

```

```

Energy (298K)    :   -292.145191 a.u.
                  -767027.20 kJ/mol

```

```

Enthalpy (298K) :   -292.144247 a.u.
                  -767024.72 kJ/mol

```

```

Free Energy (298K): -292.188798 a.u.
                  -767141.69 kJ/mol

```

```

Lowest Frequency  56.1247 cm-1
=====

```

1

BP86/Iso-N/iso-n.log

Route: #P BP86/Gen/Auto Opt Freq GFInput

Atom Coordinates (x,y,z) in Angstrom

```

-----
C   2.542058   0.358688  -0.269136
O   1.595356  -0.718698  -0.241701
H   0.680367  -0.363407  -0.058991
C   2.707955   1.000795   1.114590
H   3.062665   0.246129   1.847636
H   3.439660   1.836547   1.087431
H   1.743079   1.408886   1.482498
C   3.854880  -0.212886  -0.799662
H   4.224047  -1.011803  -0.122893
H   4.633848   0.574155  -0.871799
H   3.707287  -0.656710  -1.804646
H   2.193582   1.146721  -0.979059
N  -1.173998   0.087970  -0.043267
C  -1.166769   1.543812  -0.316572
C  -1.660035  -0.689001  -1.205444
C  -1.866020  -0.256525   1.227543
C  -1.383443  -2.188908  -1.114834
H  -0.302763  -2.386198  -0.968248
H  -1.948571  -2.666964  -0.288793
H  -1.705002  -2.680740  -2.055974
H  -2.751823  -0.526035  -1.366229
H  -1.145271  -0.279098  -2.094745
H  -0.484242   1.708105  -1.172558
C  -2.518823   2.214945  -0.604941
H  -2.993668   1.815314  -1.523670
H  -3.233103   2.085403   0.234461
H  -2.373594   3.305211  -0.753090
H  -0.687748   2.031884   0.553213
C  -1.039012  -1.149654   2.155449
H  -1.608506  -1.368151   3.083881
H  -0.776911  -2.112939   1.677205
H  -0.089718  -0.653298   2.439947
H  -2.105613   0.683570   1.758878
H  -2.847615  -0.730401   1.010060
-----

```

```

Energy E(RB-P86)      -486.69707692 a.u.
                    -1277823.18 kJ/mol

```

SCF Convergence: 0.2338D-08

&lt;S\*\*2&gt;: 0.0000

Charge: 0.0000

Maximum Force: 0.000014

```

ZPE-correction      :          0.304161 a.u.
                    798.57 kJ/mol

```

```

Energy (298K)       :      -486.376259 a.u.
                    -1276980.87 kJ/mol

```

```

Enthalpy (298K)    :      -486.375314 a.u.
                    -1276978.39 kJ/mol

```

```

Free Energy (298K) :      -486.438187 a.u.
                    -1277143.46 kJ/mol

```

Lowest Frequency 24.3627 cm<sup>-1</sup>

=====

**Isopropanol**

BP86/Iso/iso.log

Route: #P BP86/Gen/Auto Opt Freq GFInput

Atom Coordinates (x,y,z) in Angstrom

```

-----
O   -0.038252   1.383320  -0.161431
H   -0.893854   1.771571   0.092680
C    0.002564   0.035189   0.363327
H   -0.006096   0.078716   1.477063
C   -1.206394  -0.778882  -0.104165
H   -1.226689  -0.844770  -1.211951
H   -1.177004  -1.809021   0.309276
H   -2.158457  -0.314441   0.232687
C    1.330380  -0.559631  -0.090093
H    1.371084  -0.614039  -1.197807
H    1.462092  -1.582339   0.318530
H    2.175637   0.067703   0.256557
-----

```

```

Energy E(RB-P86)   -194.33571761 a.u.
                   -510228.43 kJ/mol

```

SCF Convergence: 0.6064D-09

Maximum Force: 0.000004

```

ZPE-correction    :           0.104191 a.u.
                   273.55 kJ/mol

```

```

Energy (298K)      :   -194.225967 a.u.
Enthalpy (298K)   :   -194.225023 a.u.
Free Energy (298K):   -194.258991 a.u.
Lowest Frequency   224.8565 cm-1
=====

```

**H<sub>2</sub>O**

BP86/H2O/h2o.log

Route: #P BP86/Gen/Auto Opt Freq GFInput

Atom Coordinates (x,y,z) in Angstrom

```

-----
O    0.000000   0.000000   0.119503
H    0.000000   0.766501  -0.478011
H    0.000000  -0.766501  -0.478011
-----

```

```

Energy E(RB-P86)   -76.46073116 a.u.
                   -200747.65 kJ/mol

```

SCF Convergence: 0.4418D-09

&lt;S\*\*2&gt;: 0.0000

Charge: 0.0000

Maximum Force: 0.000043

```

ZPE-correction    :           0.020586 a.u.
                   54.05 kJ/mol

```

```

Energy (298K)      :   -76.437309 a.u.
                   -200686.15 kJ/mol
Enthalpy (298K)   :   -76.436365 a.u.
                   -200683.68 kJ/mol
Free Energy (298K):   -76.457820 a.u.
                   -200740.01 kJ/mol

```

```

Lowest Frequency   1568.3493 cm-1
=====

```

2

BP86/HFIP-N/hfip-n.log

Route: #P BP86/Gen/Auto Opt Freq GFInput

Atom Coordinates (x,y,z) in Angstrom

```

-----
C   -1.260570    0.102972   -0.273662
O   -0.290611    0.652655    0.566354
H    0.654757    0.393670    0.257829
C   -1.624599   -1.341628    0.160067
F   -2.131315   -1.405290    1.403855
F   -2.499679   -1.924235   -0.690570
F   -0.487661   -2.101023    0.142472
C   -2.469524    1.066723   -0.300539
F   -2.957531    1.314563    0.928952
F   -3.477005    0.575351   -1.063494
F   -2.085492    2.244483   -0.845428
H   -0.930729    0.017915   -1.333209
N    2.273909    0.104155   -0.162088
C    2.895084    1.450205   -0.263373
C    2.930600   -0.772536    0.854708
C    2.195199   -0.553052   -1.496877
C    2.763650    2.308488    0.993169
H    1.705776    2.403410    1.309933
H    3.352123    1.902890    1.840669
H    3.154482    3.324967    0.782490
H    3.970411    1.363094   -0.537856
H    2.393441    1.961070   -1.106652
H    1.591674    0.112242   -2.144250
C    3.519626   -0.878321   -2.200401
H    4.106764    0.033173   -2.429573
H    4.156448   -1.556165   -1.595992
H    3.311543   -1.389572   -3.162767
H    1.603267   -1.475897   -1.358428
C    2.219645   -0.816202    2.208908
H    2.777958   -1.484101    2.897973
H    2.152260    0.181367    2.682087
H    1.189948   -1.208684    2.104531
H    2.959364   -1.796931    0.442030
H    3.991530   -0.467305    0.980886
-----

```

```

Energy E(RB-P86)  -1081.71477822 a.u.
                  -2840042.15 kJ/mol

```

SCF Convergence: 0.1804D-08

&lt;S\*\*2&gt;: 0.0000

Charge: 0.0000

Maximum Force: 0.000052

```

ZPE-correction   :          0.259807 a.u.
                  682.12 kJ/mol

```

```

Energy (298K)    :   -1081.434578 a.u.
                  -2839306.48 kJ/mol

```

```

Enthalpy (298K) :   -1081.433634 a.u.
                  -2839304.01 kJ/mol

```

```

Free Energy (298K): -1081.506438 a.u.
                  -2839495.15 kJ/mol

```

Lowest Frequency 22.1586 cm<sup>-1</sup>

=====

**HFIP**

BP86/HFIP/hfip.log

Route: #P BP86/Gen/Auto Opt Freq GFInput

Atom Coordinates (x,y,z) in Angstrom

```

-----
O   0.041113   1.874702  -0.016359
H  -0.799683   2.299729  -0.264934
C   0.004185   0.543045  -0.488795
C   1.312251  -0.135430  -0.027880
C  -1.285904  -0.172617  -0.022019
H   0.001009   0.485557  -1.599627
F   1.331985  -1.427910  -0.428628
F   2.364684   0.491775  -0.593418
F   1.465948  -0.100580   1.306613
F  -1.434559  -1.371955  -0.614716
F  -1.353291  -0.333399   1.308972
F  -2.342924   0.609525  -0.397979
-----

```

```

-----
Energy E(RB-P86)   -789.34444586 a.u.
                   -2072423.84 kJ/mol
-----

```

SCF Convergence: 0.3700D-08

&lt;S\*\*2&gt;: 0.0000

Charge: 0.0000

Maximum Force: 0.000003

```

ZPE-correction   :           0.060008 a.u.
                  157.55 kJ/mol

```

```

Energy (298K)    :   -789.275066 a.u.
                  -2072241.69 kJ/mol

```

```

Enthalpy (298K) :   -789.274122 a.u.
                  -2072239.21 kJ/mol

```

```

Free Energy (298K): -789.319936 a.u.
                  -2072359.49 kJ/mol

```

Lowest Frequency 38.0356 cm-1

=====

5

BP86/W-CO/wco.log

Route: #P BP86/GenECP/Auto GFInput Opt(CalcFC) Freq

```

-----
W   1.861100   0.137273   0.015361
H   2.176234   0.187316  -1.786945
C   3.573468   1.278418   0.095004
N   1.556374   0.093793   1.870825
C   0.247201  -0.979626  -0.496655
O   4.545156   1.920061   0.094928
O   1.369170   0.062356   3.048607
O  -0.670546  -1.635504  -0.832348
P   0.590714   2.227575  -0.588328
P   3.283914  -1.919611  -0.203887
C  -0.229358   3.085241   0.831427
C   1.588196   3.581978  -1.362838
C  -0.789032   2.032202  -1.804673
C   5.061681  -1.664678  -0.657028
C   2.738174  -3.136942  -1.487482
C   3.404196  -2.965007   1.320632
H  -0.960039   2.391727   1.290679
H   0.535836   3.337682   1.591822
H  -0.750854   4.009379   0.506253
H   2.383338   3.906188  -0.662993
H   0.950034   4.451758  -1.621965
H   2.071733   3.191664  -2.280015
H  -1.231503   3.014807  -2.068670
H  -1.581437   1.386670  -1.377560
H  -0.396243   1.547498  -2.720104
H   5.595375  -2.630929  -0.769136
H   5.559036  -1.060323   0.126935
H   5.111933  -1.102767  -1.610561
H   2.705598  -2.626940  -2.470342
H   1.715944  -3.490856  -1.248507
H   3.424907  -4.006864  -1.540420
H   2.386337  -3.281849   1.622416
H   4.037150  -3.861838   1.156332
H   3.830010  -2.357336   2.143477
H  -2.498254  -1.114439  -1.049393
O  -3.371311  -0.689809  -1.194175
C  -4.175787  -0.887907  -0.055408
H  -4.030165  -1.887510   0.404940
C  -5.648025  -0.842649  -0.523433
C  -3.828859   0.144557   1.048106
F  -5.879173  -1.868236  -1.370373
F  -5.944078   0.305118  -1.161093
F  -6.490827  -0.975339   0.527204
F  -4.034038   1.416951   0.654437
F  -2.504836   0.020239   1.349163
F  -4.524970  -0.072911   2.182047
-----

```

Energy E(RB-P86) -2136.15010395 a.u.  
-5608462.10 kJ/mol

SCF Convergence: 0.5671D-08

Maximum Force: 0.000033

ZPE-correction : 0.312881 a.u.

Energy (298K) : -2135.801716 a.u.

Enthalpy (298K) : -2135.800771 a.u.

Free Energy (298K): -2135.911817 a.u.

-5607836.48 kJ/mol

Lowest Frequency 9.9571 cm-1

=====

3'

BP86/W-H/wh.log

Route: #P BP86/GenECP/Auto GFInput Opt Freq

```

-----
W   -1.553686  -0.085160  -0.071321
H    0.057285   0.332529   0.713634
C   -0.534143  -0.103913  -1.852513
N   -3.232539  -0.361894  -0.851834
C   -2.255656  -0.025172   1.858204
O    0.063585  -0.107066  -2.853170
O   -4.309281  -0.493004  -1.347553
O   -2.623889   0.007537   2.962578
P   -1.618291   2.431342  -0.148279
P   -0.974082  -2.513896   0.325727
C   -0.233903   3.272070  -1.045776
H   -0.366530   4.373704  -1.046260
H   -0.191081   2.907845  -2.091096
H    0.721331   3.020059  -0.545181
C   -3.123980   3.135714  -0.962290
H   -3.113504   4.245181  -0.951580
H   -3.171202   2.776466  -2.009332
H   -4.026778   2.768999  -0.435441
C   -1.592831   3.306703   1.482853
H   -1.582990   4.407456   1.345413
H   -0.691448   2.997326   2.047447
H   -2.486786   3.018373   2.070177
C   -0.224465  -2.919953   1.968372
H   -0.892745  -2.574085   2.781286
H    0.747218  -2.395881   2.060146
H   -0.060564  -4.012641   2.066914
C    0.201585  -3.335802  -0.842471
H   -0.182591  -3.248440  -1.877652
H    1.184072  -2.827547  -0.784219
H    0.330363  -4.407965  -0.587436
C   -2.455434  -3.623570   0.262114
H   -2.178199  -4.680813   0.454465
H   -2.928028  -3.540951  -0.736487
H   -3.192449  -3.291334   1.019551
H    1.373457  -0.237109   0.792545
O    2.312143  -0.593949   0.865552
C    3.124933   0.119552  -0.028821
C    3.705155   1.390372   0.643969
C    4.198229  -0.852714  -0.566524
H    2.567756   0.480639  -0.919671
F    4.486726   1.115378   1.702249
F    2.669466   2.159770   1.083266
F    4.414899   2.138932  -0.231546
F    4.909539  -1.428039   0.419903
F    3.591384  -1.840018  -1.273177
F    5.058221  -0.226716  -1.401838
-----

```

Energy E(RB-P86) -2136.15731231 a.u.  
-5608481.02 kJ/mol

SCF Convergence: 0.4132D-08

Maximum Force: 0.000342

ZPE-correction : 0.312890 a.u.  
821.49 kJ/mol

Energy (298K) : -2135.809105 a.u.

Enthalpy (298K) : -2135.808161 a.u.

Free Energy (298K): -2135.918251 a.u.

Lowest Frequency 9.1652 cm-1

=====



3

BP86/W-H/whfixbp86f.log

Route: # BP86/GenECP/Auto GFInput Int=UltraFine Freq

```

-----
W   1.533643  -0.000374  -0.082876
H   -0.144191  0.001415   0.668581
C    0.538004  0.000559  -1.879073
N    3.245625  -0.001763  -0.839527
C    2.184708  -0.001229   1.863365
O   -0.052985  0.001041  -2.882996
O    4.335856  -0.002625  -1.322949
O    2.522934  -0.001743   2.978596
P    1.265147  -2.502682   0.090792
P    1.269617   2.502324   0.091259
C    0.383108  -3.370318  -1.286618
H    0.357537  -4.467544  -1.122966
H    0.893970  -3.152636  -2.245159
H   -0.654860  -2.988717  -1.346342
C    2.866289  -3.427490   0.188458
H    2.698633  -4.521648   0.266530
H    3.468968  -3.210472  -0.715743
H    3.435008  -3.077471   1.072510
C    0.343669  -3.101218   1.578584
H    0.324115  -4.209830   1.616698
H   -0.694369  -2.717013   1.536481
H    0.825466  -2.709552   2.496094
C    0.338656   3.101397   1.572939
H    0.812893   2.707722   2.493520
H   -0.699897   2.719511   1.522951
H    0.321265   4.210008   1.612073
C    0.399263   3.373062  -1.291606
H    0.916649   3.155404  -2.246646
H   -0.638933   2.993337  -1.359252
H    0.374490   4.470162  -1.127016
C    2.872104   3.423355   0.201432
H    2.706502   4.517823   0.279575
H    3.480734   3.205923  -0.698673
H    3.433612   3.070972   1.089146
H   -1.435061   0.002792   1.246727
O   -2.423996   0.002416   1.420521
C   -3.048168   0.001429   0.162920
C   -3.870231  -1.297997  -0.001871
C   -3.871534   1.299886  -0.002849
H   -2.312133   0.001577  -0.668476
F   -4.803114  -1.448120   0.954393
F   -3.023754  -2.363686   0.073409
F   -4.480044  -1.357234  -1.207669
F   -4.807681   1.447521   0.950640
F   -3.026742   2.366591   0.076242
F   -4.477611   1.359627  -1.210494
-----

```

Energy E(RB-P86) -2136.15749326 a.u.  
-5608481.50 kJ/mol

SCF Convergence: 0.2645D-08

Maximum Force: 0.000304

ZPE-correction : 0.312149 a.u.  
819.55 kJ/mol

Energy (298K) : -2135.809719 a.u.

Enthalpy (298K) : -2135.808775 a.u.

Free Energy (298K): -2135.920261 a.u.

Lowest Frequency 5.6919 cm-1

=====

7

BP86/W-Iso/wiso.log

Route: #P BP86/GenECP/Auto Freq

```

-----
W    0.707560    0.264579   -0.055543
H   -0.736530   -0.721058    0.528769
C   -0.006689   -0.140974   -1.938867
N    2.224816    1.193960   -0.641086
C    1.094423    0.488191    1.945268
O   -0.428185   -0.387252   -2.996238
O    3.205459    1.763024   -1.016458
O    1.283400    0.600914    3.090666
P    1.741878   -2.023467    0.044157
P   -0.836598    2.258844    0.112775
C    1.091375   -3.294138   -1.137075
H    1.585193   -4.277153   -0.991629
H    1.260703   -2.949327   -2.176312
H   -0.000384   -3.403719   -0.983950
C    3.564090   -2.072072   -0.282138
H    3.965415   -3.105056   -0.225548
H    3.761186   -1.652651   -1.288478
H    4.080402   -1.432468    0.460660
C    1.596787   -2.903730    1.667032
H    2.051053   -3.915284    1.626640
H    0.524549   -2.988454    1.931921
H    2.098539   -2.306921    2.454212
C   -1.927990    2.316643    1.605124
H   -1.310917    2.252232    2.522954
H   -2.616678    1.448457    1.570120
H   -2.520321    3.254838    1.624368
C   -2.049462    2.519840   -1.258265
H   -1.508487    2.600884   -2.221682
H   -2.721938    1.638345   -1.292675
H   -2.650668    3.437948   -1.093107
C    0.061524    3.876692    0.193812
H   -0.646441    4.728308    0.265594
H    0.688995    3.992673   -0.711928
H    0.730508    3.877631    1.077075
H   -2.337466   -0.594777    0.174428
O   -3.303656   -0.437785    0.021202
C   -3.963097   -1.714689   -0.096975
C   -3.880549   -2.504312    1.213803
C   -5.400448   -1.432745   -0.522956
H   -3.466347   -2.306087   -0.900235
H   -4.374656   -1.943199    2.034406
H   -2.823764   -2.678662    1.505398
H   -4.375606   -3.494150    1.116982
H   -5.919152   -0.827668    0.249898
H   -5.421407   -0.867398   -1.476206
H   -5.964013   -2.377969   -0.663826
-----

```

```

Energy E(RB-P86)  -1541.14174596 a.u.
                  -4046267.65 kJ/mol

```

SCF Convergence: 0.8273D-08

Maximum Force: 0.000098

ZPE-correction : 0.357283 a.u.

Energy (298K) : -1540.752999 a.u.

Enthalpy (298K) : -1540.752055 a.u.

Free Energy (298K): -1540.851773 a.u.

-4045506.33 kJ/mol

Lowest Frequency 11.2150 cm-1

=====

4

BP86/W-NO/wno.log

Route: #P BP86/GenECP/Auto GFInput Opt Freq

```

-----
W   -1.716953    0.169410   -0.019216
H   -3.067553    1.201074    0.656074
C   -1.405232   -0.064862    1.994126
N   -0.348684   -0.923412   -0.658762
C   -2.512541    0.779541   -1.804733
O   -1.294799   -0.154226    3.149310
O    0.528119   -1.662382   -1.056995
O   -3.015161    1.160462   -2.785823
P   -0.480447    2.373647    0.057616
P   -3.478839   -1.623143    0.057734
C   -1.543133    3.851806   -0.274919
H   -2.010878    3.751823   -1.274207
H   -2.351032    3.891511    0.481665
H   -0.947952    4.787546   -0.239675
C    0.362734    2.847052    1.636655
H   -0.374914    2.850756    2.463186
H    0.826765    3.851659    1.553911
H    1.149179    2.103034    1.868511
C    0.876932    2.546683   -1.185024
H    1.342028    3.552812   -1.131229
H    1.650917    1.774689   -0.999128
H    0.462852    2.386718   -2.200082
C   -5.226819   -1.025123    0.135614
C   -3.399877   -2.822557    1.467176
C   -3.490486   -2.751522   -1.411389
H   -5.944795   -1.871111    0.135683
H   -5.356904   -0.422101    1.055425
H   -5.426494   -0.368483   -0.733932
H   -4.193522   -3.594899    1.394517
H   -2.406933   -3.314613    1.465998
H   -3.510527   -2.272918    2.422831
H   -4.273825   -3.532527   -1.321314
H   -3.669577   -2.155342   -2.328088
H   -2.497777   -3.235469   -1.504056
H    2.117409   -0.874376   -1.172607
O    2.965180   -0.359754   -1.181935
C    3.854470   -0.935508   -0.257982
H    3.681239   -2.022938   -0.119168
C    5.282391   -0.800151   -0.834047
C    3.671873   -0.294862    1.141614
F    6.204292   -1.297674    0.024468
F    5.368307   -1.504553   -1.982863
F    5.604257    0.480329   -1.101234
F    4.473051   -0.859637    2.069218
F    3.898235    1.036449    1.136033
F    2.385002   -0.485212    1.542128
-----

```

Energy E(RB-P86) -2136.15481743 a.u.  
-5608474.47 kJ/mol

SCF Convergence: 0.7628D-08

Maximum Force: 0.000004

ZPE-correction : 0.313067 a.u.  
821.96 kJ/mol

Energy (298K) : -2135.806480 a.u.

Enthalpy (298K) : -2135.805536 a.u.

Free Energy (298K): -2135.915661 a.u.

Lowest Frequency 7.5821 cm-1

=====

6

BP86/W-Water/ww.log

Route: #P BP86/GenECP/Auto GFInput Opt Freq

Atom Coordinates (x,y,z) in Angstrom

```

-----
W   -0.082332  -0.163969  -0.094419
H   -0.041957   1.190444   1.152996
C   -0.039528   1.332023  -1.499973
N   -0.218553  -1.563321  -1.332259
C   -0.087558  -1.370724   1.564363
O   -0.022655   2.199673  -2.277661
O   -0.329619  -2.458713  -2.114536
O   -0.083362  -2.028125   2.527045
P   -2.535902   0.273105   0.236041
P    2.441826  -0.138918   0.044986
C   -3.111585   2.000972  -0.103607
H   -4.197058   2.114104   0.096706
H   -2.905464   2.258191  -1.161307
H   -2.542788   2.700728   0.539889
C   -3.676146  -0.740357  -0.814806
H   -4.740733  -0.500318  -0.613894
H   -3.449090  -0.549411  -1.882299
H   -3.495586  -1.814900  -0.614268
C   -3.199839  -0.012659   1.942050
H   -4.275431   0.251914   2.009781
H   -2.620906   0.602109   2.659272
H   -3.066118  -1.077992   2.215170
C    3.167987   0.050608   1.736119
H    2.766387  -0.736194   2.404591
H    2.883798   1.044001   2.137698
H    4.274445  -0.026845   1.699735
C    3.343940   1.162178  -0.910027
H    3.068553   1.093518  -1.980929
H    3.034139   2.151632  -0.516107
H    4.442414   1.047256  -0.801840
C    3.211557  -1.710706  -0.561603
H    4.318207  -1.672612  -0.488968
H    2.915834  -1.877534  -1.616233
H    2.831051  -2.559971   0.039742
H    1.006638   2.424597   1.238098
O    1.685241   3.133647   1.379297
H    1.177450   3.961514   1.351360
-----

```

```

Energy E(RB-P86)  -1423.26813600 a.u.
                  -3736790.49 kJ/mol

```

SCF Convergence: 0.5294D-08

&lt;S\*\*2&gt;: 0.0000

Charge: 0.0000

Maximum Force: 0.000117

```

ZPE-correction   :           0.275054 a.u.
                  722.15 kJ/mol

```

```

Energy (298K)    :   -1422.965522 a.u.
                  -3735995.98 kJ/mol

```

```

Enthalpy (298K) :   -1422.964578 a.u.
                  -3735993.50 kJ/mol

```

```

Free Energy (298K): -1423.053640 a.u.
                  -3736227.33 kJ/mol

```

```

Lowest Frequency  13.1843 cm-1
=====

```

WH(CO)<sub>2</sub>(NO)(PMe<sub>3</sub>)<sub>2</sub>

BP86/W/w.log

Route: #P BP86/GenECP/Auto GFInput Opt Freq

Atom Coordinates (x,y,z) in Angstrom

```

-----
W   -0.000031   0.000060   0.001041
H    0.000186   0.000468  -1.824747
C   -0.000117  -2.006604  -0.386649
C   -0.000221   2.006801  -0.386295
N    0.000579  -0.000253   1.880509
O   -0.000211  -3.131313  -0.700016
O   -0.000392   3.131515  -0.699642
O    0.001388  -0.000452   3.076849
P   -2.502994  -0.000027  -0.203986
P    2.502864   0.000022  -0.204353
C   -3.182573   0.000503  -1.925367
C   -3.375392  -1.438087   0.576081
C   -3.375477   1.437410   0.577126
C    3.375292  -1.437865   0.575997
C    3.182374   0.000195  -1.925753
C    3.375318   1.437636   0.576457
H   -4.477560   1.351496   0.477916
H   -3.104975   1.481819   1.651081
H   -3.035162   2.376416   0.097124
H   -4.477477  -1.352180   0.476885
H   -3.035000  -2.376721   0.095411
H   -3.104938  -1.483254   1.650016
H   -4.292344   0.000746  -1.926500
H   -2.807889   0.895758  -2.459421
H   -2.808318  -0.894755  -2.459724
H    4.292145   0.000556  -1.926925
H    2.808197  -0.895246  -2.459858
H    2.807565   0.895265  -2.460029
H    4.477377  -1.351963   0.476804
H    3.104818  -1.482831   1.649936
H    3.034919  -2.376597   0.095503
H    4.477405   1.351719   0.477310
H    3.035002   2.376529   0.096234
H    3.104771   1.482278   1.650391
-----

```

```

Energy E(RB-P86)  -1346.79699799 a.u.
                  -3536015.52 kJ/mol

```

SCF Convergence: 0.2594D-08

&lt;S\*\*2&gt;: 0.0000

Charge: 0.0000

Maximum Force: 0.000009

```

ZPE-correction   :           0.251668 a.u.
                  660.75 kJ/mol

```

```

Energy (298K)    :   -1346.521080 a.u.
                  -3535291.10 kJ/mol

```

```

Enthalpy (298K) :   -1346.520135 a.u.
                  -3535288.61 kJ/mol

```

```

Free Energy (298K): -1346.601241 a.u.
                  -3535501.56 kJ/mol

```

Lowest Frequency 16.6303 cm<sup>-1</sup>

=====

**NET<sub>3</sub>**

PBE/N/n2.log

Route: #P PBE/PBE/Gen/Auto Opt Freq GFInput

Atom Coordinates (x,y,z) in Angstrom

```

-----
N      0.000067  -0.299387  -0.029446
C     -1.216199  -1.083549   0.190747
C     -0.000080   0.987564   0.690714
C      1.216474  -1.083309   0.190828
C     -0.000364   2.203967  -0.234018
H      0.892744   2.203693  -0.889638
H     -0.893621   2.203462  -0.889435
H     -0.000424   3.146503   0.353041
H     -0.879678   1.032916   1.365381
H      0.879655   1.033204   1.365177
C      2.467579  -0.440442  -0.400294
H      3.345007  -1.102230  -0.253322
H      2.339089  -0.258524  -1.485797
H      2.704334   0.528929   0.082928
H      1.384479  -1.291135   1.279461
H      1.058639  -2.068342  -0.285662
C     -2.467445  -0.440831  -0.400238
H     -3.344730  -1.102828  -0.253355
H     -2.704391   0.528408   0.083154
H     -2.339023  -0.258711  -1.485716
H     -1.058202  -2.068487  -0.285887
H     -1.384140  -1.291556   1.279357
-----

```

```

Energy E(RPBE-PBE)  -291.94878450 a.u.
                   -766511.53 kJ/mol

```

SCF Convergence: 0.2181D-08

&lt;S\*\*2&gt;: 0.0000

Charge: 0.0000

Maximum Force: 0.000046

```

ZPE-correction      :           0.198468 a.u.
                   521.08 kJ/mol

```

```

Energy (298K)       :      -291.740762 a.u.
                   -765965.37 kJ/mol

```

```

Enthalpy (298K)    :      -291.739818 a.u.
                   -765962.89 kJ/mol

```

```

Free Energy (298K) :      -291.784184 a.u.
                   -766079.38 kJ/mol

```

```

Lowest Frequency    60.3791 cm-1
=====

```

1

PBE/Iso-N/iso-n2.log

Route: #P PBE/PBE/Gen/Auto Opt Freq GFInput

Atom Coordinates (x,y,z) in Angstrom

```

-----
C    2.523104    0.362272   -0.282453
O    1.585772   -0.717570   -0.316491
H    0.673224   -0.374656   -0.107871
C    2.639525    0.966761    1.120060
H    2.971769    0.194096    1.843610
H    3.367892    1.804154    1.140092
H    1.662064    1.362192    1.465716
C    3.854695   -0.182982   -0.784162
H    4.210737   -0.993139   -0.115248
H    4.626345    0.612455   -0.814196
H    3.742318   -0.604527   -1.802180
H    2.193553    1.169046   -0.980650
N   -1.170206    0.083003   -0.045090
C   -1.155697    1.532350   -0.328053
C   -1.677949   -0.700971   -1.187654
C   -1.830786   -0.250755    1.240194
C   -1.401319   -2.197400   -1.087180
H   -0.318540   -2.394756   -0.963502
H   -1.946269   -2.665024   -0.242870
H   -1.745035   -2.699450   -2.013681
H   -2.771934   -0.538407   -1.330302
H   -1.179591   -0.300542   -2.090070
H   -0.483664    1.685762   -1.194099
C   -2.504233    2.208890   -0.601413
H   -2.994084    1.804920   -1.509232
H   -3.206611    2.089257    0.248304
H   -2.355490    3.296174   -0.759670
H   -0.660209    2.023346    0.530539
C   -0.972054   -1.113742    2.163082
H   -1.519689   -1.332650    3.103218
H   -0.698795   -2.075924    1.690458
H   -0.028355   -0.596169    2.424960
H   -2.079463    0.692310    1.761294
H   -2.806622   -0.745463    1.048406
-----

```

```

Energy E(RPBE-PBE)    -486.04554638 a.u.
                    -1276112.58 kJ/mol

```

SCF Convergence: 0.2169D-08

&lt;S\*\*2&gt;: 0.0000

Charge: 0.0000

Maximum Force: 0.000003

```

ZPE-correction      :          0.304923 a.u.
                    800.58 kJ/mol

```

```

Energy (298K)       :          -485.724038 a.u.
                    -1275268.46 kJ/mol

```

```

Enthalpy (298K)    :          -485.723093 a.u.
                    -1275265.98 kJ/mol

```

```

Free Energy (298K) :          -485.785510 a.u.
                    -1275429.86 kJ/mol

```

Lowest Frequency 29.7667 cm<sup>-1</sup>

=====

**Isopropanol**

PBE/Iso/iso2.log

Route: #P PBE/PBE/Gen/Auto Opt Freq GFInput

Atom Coordinates (x,y,z) in Angstrom

```

-----
O   -0.040777   1.380521  -0.160610
H   -0.899093   1.763588   0.088289
C    0.002515   0.036626   0.362688
H   -0.005899   0.077978   1.476228
C   -1.201837  -0.779747  -0.103847
H   -1.220618  -0.845201  -1.210813
H   -1.168838  -1.808808   0.309275
H   -2.154369  -0.318108   0.232336
C    1.328446  -0.556331  -0.090041
H    1.367234  -0.610758  -1.196966
H    1.460553  -1.577916   0.318490
H    2.172498   0.071775   0.255242
-----

```

```

Energy E(RPBE-PBE)   -194.08504439 a.u.
                    -509570.28 kJ/mol

```

SCF Convergence: 0.2482D-08

Maximum Force: 0.000104

```

ZPE-correction      :           0.104478 a.u.
                    274.31 kJ/mol

```

Energy (298K) : -193.975025 a.u.

Enthalpy (298K) : -193.974081 a.u.

Free Energy (298K): -194.008008 a.u.

Lowest Frequency 227.3083 cm<sup>-1</sup>

=====

**H<sub>2</sub>O**

PBE/H2O/h2o.log

Route: #P PBE/PBE/Gen/Auto Opt Freq GFInput

Atom Coordinates (x,y,z) in Angstrom

```

-----
O    0.000000   0.000000   0.119418
H    0.000000   0.765591  -0.477671
H    0.000000  -0.765591  -0.477671
-----

```

```

Energy E(RPBE-PBE)   -76.37435885 a.u.
                    -200520.88 kJ/mol

```

SCF Convergence: 0.2950D-09

&lt;S\*\*2&gt;: 0.0000

Charge: 0.0000

Maximum Force: 0.000048

```

ZPE-correction      :           0.020662 a.u.
                    54.25 kJ/mol

```

Energy (298K) : -76.350860 a.u.

-200459.18 kJ/mol

Enthalpy (298K) : -76.349916 a.u.

-200456.70 kJ/mol

Free Energy (298K): -76.371369 a.u.

-200513.03 kJ/mol

Lowest Frequency 1570.3895 cm<sup>-1</sup>

=====



2

PBE/HFIP-N/hfip-n2.log

Route: #P PBE/PBE/Gen/Auto Opt Freq GFInput

Atom Coordinates (x,y,z) in Angstrom

```

-----
C    1.261770    0.122298    0.291435
O    0.297170    0.714552   -0.520135
H   -0.647608    0.429505   -0.237241
C    1.563049   -1.329527   -0.156574
F    2.013345   -1.403717   -1.419449
F    2.451643   -1.940738    0.654208
F    0.405048   -2.053591   -0.094970
C    2.506152    1.035151    0.293515
F    2.987660    1.247979   -0.943465
F    3.499213    0.508912    1.048246
F    2.178879    2.230890    0.828814
H    0.956213    0.043680    1.359314
N   -2.261382    0.122559    0.165756
C   -2.896947    1.460184    0.215284
C   -2.892957   -0.795612   -0.823251
C   -2.180225   -0.484189    1.519256
C   -2.770853    2.272284   -1.068571
H   -1.713908    2.363434   -1.387275
H   -3.354387    1.831821   -1.900659
H   -3.169130    3.291828   -0.895557
H   -3.971773    1.371322    0.489722
H   -2.404397    2.007158    1.040585
H   -1.588773    0.211509    2.145052
C   -3.500869   -0.802791    2.225735
H   -4.103784    0.106346    2.416228
H   -4.122440   -1.512441    1.643834
H   -3.291659   -1.273468    3.207189
H   -1.574826   -1.402596    1.416297
C   -2.177661   -0.867273   -2.171199
H   -2.721387   -1.565299   -2.840197
H   -2.126492    0.115260   -2.674959
H   -1.142481   -1.238744   -2.053052
H   -2.902361   -1.806775   -0.379456
H   -3.959349   -0.517629   -0.963268
-----

```

```

Energy E(RPBE-PBE)  -1080.55032758 a.u.
                   -2836984.89 kJ/mol

```

SCF Convergence: 0.4869D-08

&lt;S\*\*2&gt;: 0.0000

Charge: 0.0000

Maximum Force: 0.000019

```

ZPE-correction      :           0.260566 a.u.
                   684.12 kJ/mol

```

```

Energy (298K)       :   -1080.269468 a.u.
                   -2836247.49 kJ/mol

```

```

Enthalpy (298K)    :   -1080.268524 a.u.
                   -2836245.01 kJ/mol

```

```

Free Energy (298K) :   -1080.341075 a.u.
                   -2836435.49 kJ/mol

```

Lowest Frequency 18.4397 cm<sup>-1</sup>

=====

## HFIP

PBE/HFIP/hfip2.log

Route: #P PBE/PBE/Gen/Auto Opt Freq GFInput

Atom Coordinates (x,y,z) in Angstrom

```

-----
O   0.040318   1.873137  -0.020331
H  -0.806986   2.291078  -0.255195
C   0.004101   0.543736  -0.490127
C   1.308369  -0.134854  -0.028112
C  -1.281530  -0.172605  -0.022488
H   0.001402   0.483700  -1.600709
F   1.327199  -1.424889  -0.430120
F   2.360994   0.492011  -0.588346
F   1.456251  -0.101671   1.305313
F  -1.427948  -1.370194  -0.614261
F  -1.344214  -0.333058   1.307002
F  -2.339237   0.606965  -0.394819
-----

```

```

-----
Energy E(RPBE-PBE)   -788.58046027 a.u.
                    -2070418.00 kJ/mol
-----

```

SCF Convergence: 0.6051D-08

&lt;S\*\*2&gt;: 0.0000

Charge: 0.0000

Maximum Force: 0.000073

```

ZPE-correction      :           0.060288 a.u.
                    158.29 kJ/mol

```

```

Energy (298K)       :   -788.510849 a.u.
                    -2070235.23 kJ/mol

```

```

Enthalpy (298K)    :   -788.509905 a.u.
                    -2070232.76 kJ/mol

```

```

Free Energy (298K) :   -788.555581 a.u.
                    -2070352.68 kJ/mol

```

Lowest Frequency 39.0761 cm-1

=====

5

PBE/W-CO/wcopbe.log

Route: #P PBE/PBE/GenECP/Auto Opt(CalcFC) Freq

```

-----
W   1.795217   0.152720   0.000003
H   2.180608   0.322643  -1.782478
C   3.478702   1.315791   0.184220
N   1.400537   0.003189   1.829860
C   0.256560  -0.973729  -0.676438
O   4.441757   1.967771   0.228350
O   1.149248  -0.091298   2.990228
O  -0.608175  -1.637919  -1.118235
P   0.503391   2.242220  -0.525242
P   3.248698  -1.870530  -0.221848
C  -0.367245   3.001623   0.915073
C   1.497187   3.649627  -1.192721
C  -0.839775   2.089933  -1.782371
C   5.079611  -1.616928  -0.247424
C   2.979839  -2.872418  -1.749850
C   3.040735  -3.116955   1.126918
H  -1.108871   2.277154   1.301390
H   0.370146   3.206108   1.715193
H  -0.882622   3.941574   0.631244
H   2.266569   3.942744  -0.452551
H   0.854075   4.523431  -1.420645
H   2.012889   3.317012  -2.114243
H  -1.284126   3.079060  -2.013355
H  -1.635422   1.419904  -1.402904
H  -0.418895   1.649461  -2.706770
H   5.620755  -2.576836  -0.370546
H   5.395711  -1.135937   0.698419
H   5.338725  -0.938062  -1.082832
H   3.170457  -2.230340  -2.631175
H   1.923889  -3.203275  -1.788258
H   3.646463  -3.757893  -1.778138
H   1.983194  -3.443800   1.153337
H   3.698424  -3.997466   0.978650
H   3.274558  -2.638410   2.097840
H  -2.461412  -1.133871  -1.237259
O  -3.331478  -0.686527  -1.298753
C  -4.064028  -0.932381  -0.125159
H  -3.964849  -1.977833   0.235340
C  -5.554933  -0.741787  -0.473810
C  -3.567391  -0.034745   1.034255
F  -5.921379  -1.665293  -1.384182
F  -5.802145   0.476312  -0.985749
F  -6.328619  -0.908981   0.620977
F  -3.676932   1.279545   0.752707
F  -2.247803  -0.294510   1.242684
F  -4.218436  -0.283603   2.184451
-----

```

Energy E(RPBE-PBE) -2134.19864160 a.u.  
-5603338.53 kJ/mol

SCF Convergence: 0.6192D-08

Maximum Force: 0.000113

ZPE-correction : 0.313485 a.u.  
823.05 kJ/mol

Energy (298K) : -2133.849669 a.u.

Enthalpy (298K) : -2133.848725 a.u.

Free Energy (298K): -2133.959211 a.u.

Lowest Frequency 8.3774 cm<sup>-1</sup>

=====

3'

PBE/W-H/wh.log

Route: #P PBE/PBE/GenECP/Auto GFInput Opt Freq

```

-----
W   -1.523521  -0.086352  -0.072907
H    0.008322   0.377117   0.835876
C   -0.391042  -0.078940  -1.778802
N   -3.151150  -0.376903  -0.946826
C   -2.321217  -0.060730   1.815784
O    0.280571  -0.067166  -2.731325
O   -4.201841  -0.506594  -1.491720
O   -2.737084  -0.051977   2.902996
P   -1.618029   2.418541  -0.147511
P   -0.934502  -2.503375   0.332986
C   -0.174411   3.272028  -0.922590
H   -0.312929   4.372051  -0.925491
H   -0.052919   2.915095  -1.963766
H    0.741259   3.018900  -0.354234
C   -3.051204   3.094965  -1.094846
H   -3.059065   4.203580  -1.091980
H   -2.996017   2.727161  -2.137832
H   -3.990974   2.714967  -0.649418
C   -1.749679   3.281885   1.479205
H   -1.748943   4.383624   1.355858
H   -0.894358   2.979325   2.113791
H   -2.683833   2.968309   1.984066
C   -0.206417  -2.902572   1.982084
H   -0.877593  -2.536737   2.783002
H    0.771265  -2.391575   2.076095
H   -0.059974  -3.995782   2.093127
C    0.246706  -3.324648  -0.822920
H   -0.133963  -3.239584  -1.859024
H    1.226919  -2.813668  -0.762418
H    0.375079  -4.395161  -0.564173
C   -2.416518  -3.604313   0.256454
H   -2.148120  -4.662041   0.454194
H   -2.877629  -3.519632  -0.746729
H   -3.158243  -3.263587   1.004585
H    1.317142  -0.240566   0.826729
O    2.250060  -0.614649   0.860867
C    3.050321   0.131275  -0.014165
C    3.633183   1.375819   0.696610
C    4.118366  -0.815372  -0.596475
H    2.484401   0.520904  -0.887230
F    4.409119   1.062565   1.745367
F    2.598470   2.132838   1.159241
F    4.345437   2.149293  -0.150493
F    4.852782  -1.408116   0.360326
F    3.505995  -1.788708  -1.314388
F    4.954256  -0.160664  -1.430366
-----

```

Energy E(RPBE-PBE) -2134.20630098 a.u.  
-5603358.64 kJ/mol

SCF Convergence: 0.8862D-08

Maximum Force: 0.000013

ZPE-correction : 0.313898 a.u.  
824.14 kJ/mol

Energy (298K) : -2133.857334 a.u.

Enthalpy (298K) : -2133.856390 a.u.

Free Energy (298K): -2133.964611 a.u.

Lowest Frequency 11.1632 cm-1

=====

3

PBE/W-H/whfixf.log

Route: # PBE/PBE/GenECP/Auto GFInput Int=UltraFine Freq

Atom Coordinates (x,y,z) in Angstrom

```

-----
W   -1.510338   0.000114  -0.088812
H    0.141155  -0.000035   0.711616
C   -0.471090  -0.000121  -1.855810
N   -3.200551   0.000079  -0.888601
C   -2.205331   0.000374   1.837855
O    0.147072  -0.000246  -2.842680
O   -4.277011  -0.000014  -1.396842
O   -2.564646   0.000522   2.945971
P   -1.232043   2.489440   0.098667
P   -1.232722  -2.489237   0.099129
C   -0.292666   3.352796  -1.237450
H   -0.266713   4.448262  -1.067833
H   -0.767195   3.141708  -2.215120
H    0.743737   2.964316  -1.256465
C   -2.828242   3.418977   0.135897
H   -2.658611   4.511441   0.220731
H   -3.395541   3.203151  -0.790394
H   -3.431140   3.069901   0.996569
C   -0.367768   3.077995   1.619699
H   -0.343428   4.185640   1.660430
H    0.668399   2.687675   1.615690
H   -0.887600   2.686602   2.515536
C   -0.366029  -3.077532   1.618876
H   -0.883951  -2.685299   2.515452
H    0.670383  -2.687907   1.612760
H   -0.342371  -4.185171   1.660162
C   -0.296003  -3.353363  -1.238343
H   -0.772144  -3.142360  -2.215247
H    0.740484  -2.965199  -1.259246
H   -0.270120  -4.448789  -1.068466
C   -2.829252  -3.418057   0.139503
H   -2.660008  -4.510562   0.224581
H   -3.398050  -3.202413  -0.785914
H   -3.430493  -3.068268   1.001043
H    1.409149  -0.000150   1.326175
O    2.400781  -0.000444   1.472943
C    2.977330  -0.000154   0.195437
C    3.790662   1.296079  -0.001279
C    3.790111  -1.296606  -0.002112
H    2.209867   0.000262  -0.606943
F    4.754856   1.446870   0.920165
F    2.946456   2.360391   0.103233
F    4.355595   1.353797  -1.226100
F    4.754109  -1.448486   0.919358
F    2.945420  -2.360626   0.101511
F    4.355188  -1.353694  -1.226894
-----

```

Energy E(RPBE-PBE) -2134.20667871 a.u.

-5603359.63 kJ/mol

SCF Convergence: 0.3208D-08

Maximum Force: 0.000387

ZPE-correction : 0.313094 a.u.

Energy (298K) : -2133.858144 a.u.

Enthalpy (298K) : -2133.857200 a.u.

Free Energy (298K): -2133.967240 a.u.

Lowest Frequency 5.4410 cm-1

=====

7

PBE/W-Iso/wiso.log

Route: #P PBE/PBE/GenECP/Auto Freq

```

-----
W      0.697545    0.251553   -0.063191
H     -0.696001   -0.628793    0.759471
C     -0.228112   -0.242895   -1.822892
N      2.188351    1.056797   -0.856921
C      1.286255    0.579761    1.869470
O     -0.777269   -0.544491   -2.804987
O      3.157277    1.542835   -1.352705
O      1.583019    0.751714    2.983063
P      1.596863   -2.079190    0.075945
P     -0.724978    2.320936    0.110254
C      0.544233   -3.405922   -0.664731
H      1.007796   -4.405757   -0.543234
H      0.393821   -3.197657   -1.741811
H     -0.446186   -3.394187   -0.169879
C      3.223866   -2.347801   -0.759708
H      3.563010   -3.399310   -0.665794
H      3.125561   -2.083248   -1.830434
H      3.978774   -1.673594   -0.310616
C      1.902190   -2.742696    1.773801
H      2.274336   -3.786793    1.743840
H      0.956884   -2.701697    2.349066
H      2.644459   -2.101684    2.287749
C     -1.670076    2.530883    1.681796
H     -0.976223    2.478209    2.542965
H     -2.406141    1.707115    1.762885
H     -2.203766    3.502693    1.694572
C     -2.037399    2.562757   -1.164010
H     -1.578006    2.556603   -2.171293
H     -2.748380    1.715798   -1.084328
H     -2.576721    3.519087   -1.008293
C      0.259062    3.881045    0.001232
H     -0.390642    4.776370    0.078730
H      0.802438    3.898335   -0.963471
H      1.008616    3.894230    0.816215
H     -2.298896   -0.436755    0.466820
O     -3.270105   -0.290353    0.347430
C     -3.862748   -1.533781   -0.061908
C     -3.689179   -2.611818    1.009750
C     -5.326881   -1.250435   -0.369686
H     -3.367127   -1.882632   -0.997483
H     -4.172896   -2.295257    1.956573
H     -2.614475   -2.792517    1.218960
H     -4.140799   -3.572896    0.686981
H     -5.847437   -0.888587    0.540728
H     -5.418065   -0.471664   -1.152283
H     -5.839613   -2.166303   -0.726173
-----

```

```

Energy E(RPBE-PBE)  -1539.70279858 a.u.
                   -4042489.70 kJ/mol

```

SCF Convergence: 0.8193D-08

Maximum Force: 0.000447

```

ZPE-correction      :           0.358413 a.u.
                   941.01 kJ/mol

```

Energy (298K) : -1539.313148 a.u.

Enthalpy (298K) : -1539.312204 a.u.

Free Energy (298K): -1539.410511 a.u.

Lowest Frequency 19.8195 cm<sup>-1</sup>

=====

4

PBE/W-NO/wno.log

Route: #P PBE/PBE/GenECP/Auto GFInput Opt Freq

```

-----
W   -1.660976    0.158766   -0.023728
H   -2.980550    1.167288    0.749509
C   -1.270912   -0.149619    1.963068
N   -0.339847   -0.928479   -0.758381
C   -2.511213    0.854499   -1.747252
O   -1.115774   -0.274823    3.108928
O    0.500008   -1.671450   -1.216211
O   -3.045002    1.290047   -2.687881
P   -0.413990    2.345880    0.095441
P   -3.461172   -1.576634    0.061879
C   -1.476236    3.831177   -0.179205
H   -1.963187    3.755313   -1.170892
H   -2.268815    3.853353    0.593330
H   -0.877399    4.763258   -0.132531
C    0.454049    2.772674    1.669151
H   -0.266234    2.733972    2.509261
H    0.901324    3.785911    1.612532
H    1.255599    2.033164    1.855069
C    0.917280    2.546308   -1.165410
H    1.384070    3.550065   -1.095983
H    1.692736    1.769260   -1.013315
H    0.480800    2.411080   -2.174058
C   -5.183477   -0.953083   -0.162929
C   -3.604146   -2.581292    1.606586
C   -3.314180   -2.874557   -1.245052
H   -5.919561   -1.782086   -0.139264
H   -5.405999   -0.228709    0.644039
H   -5.255485   -0.420820   -1.131253
H   -4.416750   -3.332387    1.532738
H   -2.641259   -3.095558    1.793696
H   -3.804589   -1.905985    2.461153
H   -4.122270   -3.630070   -1.166039
H   -3.355715   -2.390843   -2.240407
H   -2.329697   -3.373010   -1.148260
H    2.106291   -0.899009   -1.325934
O    2.961459   -0.400824   -1.301456
C    3.774822   -0.950581   -0.299902
H    3.606464   -2.039013   -0.160526
C    5.241715   -0.799990   -0.755113
C    3.472091   -0.297967    1.070598
F    6.092213   -1.279740    0.179780
F    5.432043   -1.506612   -1.886524
F    5.565082    0.482138   -1.000950
F    4.201931   -0.837241    2.064985
F    3.680402    1.036476    1.063469
F    2.161057   -0.499707    1.367860
-----

```

Energy E(RPBE-PBE) -2134.20344491 a.u.  
-5603351.14 kJ/mol

SCF Convergence: 0.3255D-08

Maximum Force: 0.000361

ZPE-correction : 0.313809 a.u.  
823.91 kJ/mol

Energy (298K) : -2133.854469 a.u.

Enthalpy (298K) : -2133.853524 a.u.

Free Energy (298K): -2133.962599 a.u.

Lowest Frequency 12.8958 cm-1

=====

6

PBE/W-Water/ww.log

Route: #P PBE/PBE/GenECP/Auto GFInput Freq

Atom Coordinates (x,y,z) in Angstrom

```

-----
W   -0.083130  -0.157716  -0.094919
H   -0.058252  1.171827  1.179916
C   -0.030566  1.373543  -1.456084
N   -0.229777  -1.530483  -1.357531
C   -0.089191  -1.381639  1.545673
O   -0.006293  2.266386  -2.203516
O   -0.356766  -2.408332  -2.153829
O   -0.084009  -2.043568  2.504666
P   -2.527313  0.268343  0.238049
P    2.432664  -0.151920  0.040463
C   -3.111875  1.987425  -0.108073
H   -4.197057  2.095754  0.091688
H   -2.905489  2.240386  -1.166047
H   -2.545655  2.691325  0.532020
C   -3.657726  -0.756362  -0.804783
H   -4.723401  -0.523043  -0.606405
H   -3.429606  -0.569963  -1.872157
H   -3.468135  -1.827442  -0.597844
C   -3.182085  -0.014208  1.943400
H   -4.258437  0.242729  2.014045
H   -2.603477  0.607110  2.654084
H   -3.038211  -1.076720  2.219689
C    3.164568  -0.000568  1.728328
H    2.752270  -0.791550  2.384133
H    2.894901  0.989929  2.144836
H    4.268787  -0.093329  1.687190
C    3.342984  1.150498  -0.896556
H    3.056972  1.102846  -1.965074
H    3.047130  2.135561  -0.483337
H    4.439741  1.019249  -0.799011
C    3.174119  -1.720792  -0.595736
H    4.280733  -1.702725  -0.526850
H    2.870047  -1.862156  -1.651033
H    2.779970  -2.572975  -0.008779
H    1.016614  2.395122  1.261599
O    1.711889  3.087312  1.393562
H    1.220443  3.924339  1.392297
-----

```

```

Energy E(RPBE-PBE)  -1421.99280299 a.u.
                   -3733442.10 kJ/mol

```

SCF Convergence: 0.9386D-08

&lt;S\*\*2&gt;: 0.0000

Charge: 0.0000

Maximum Force: 0.000012

```

ZPE-correction      :          0.275754 a.u.
                   723.99 kJ/mol
Energy (298K)       :   -1421.689588 a.u.
                   -3732646.01 kJ/mol
Enthalpy (298K)     :   -1421.688644 a.u.
                   -3732643.53 kJ/mol
Free Energy (298K)  :   -1421.777161 a.u.
                   -3732875.94 kJ/mol

```

Lowest Frequency 16.1319 cm-1

=====



WH(CO)<sub>2</sub>(NO)(PMe<sub>3</sub>)<sub>2</sub>

PBE/W/w2.log

Route: #P PBEPBE/GenECP/Auto GFInput Opt Freq

Atom Coordinates (x,y,z) in Angstrom

```

-----
W   -0.000029   0.000078   0.001010
H    0.000084   0.000298  -1.825902
C   -0.000137  -2.000243  -0.397725
C   -0.000125   2.000523  -0.397226
N    0.000483  -0.000284   1.878340
O   -0.000250  -3.121988  -0.719685
O   -0.000191   3.122287  -0.719116
O    0.001137  -0.000586   3.072446
P   -2.492806  -0.000029  -0.200033
P    2.492691  -0.000032  -0.200338
C   -3.174104   0.000482  -1.915941
C   -3.358254  -1.435880   0.581587
C   -3.358323   1.435293   0.582479
C    3.358109  -1.435890   0.581306
C    3.173953   0.000431  -1.916252
C    3.358225   1.435287   0.582151
H   -4.460067   1.352543   0.486355
H   -3.083293   1.477231   1.654685
H   -3.015221   2.372432   0.102337
H   -4.460000  -1.353161   0.485445
H   -3.015070  -2.372710   0.100911
H   -3.083300  -1.478393   1.653788
H   -4.283004   0.000433  -1.914875
H   -2.799326   0.895277  -2.449144
H   -2.799248  -0.893964  -2.449683
H    4.282852   0.000429  -1.915203
H    2.799130  -0.894063  -2.449937
H    2.799121   0.895176  -2.449499
H    4.459859  -1.353215   0.485171
H    3.083146  -1.478374   1.653506
H    3.014891  -2.372716   0.100645
H    4.459970   1.352512   0.486061
H    3.015151   2.372421   0.101977
H    3.083165   1.477257   1.654349
-----

```

```

Energy E(RPBE-PBE)  -1345.60505260 a.u.
                   -3532886.07 kJ/mol

```

SCF Convergence: 0.6769D-08

&lt;S\*\*2&gt;: 0.0000

Charge: 0.0000

Maximum Force: 0.000009

```

ZPE-correction      :           0.252176 a.u.
                   662.09 kJ/mol

```

```

Energy (298K)       :   -1345.328656 a.u.
                   -3532160.39 kJ/mol

```

```

Enthalpy (298K)    :   -1345.327712 a.u.
                   -3532157.91 kJ/mol

```

```

Free Energy (298K) :   -1345.408817 a.u.
                   -3532370.85 kJ/mol

```

Lowest Frequency 16.7143 cm<sup>-1</sup>

=====

**NET<sub>3</sub>**

B3LYP/N/n.log

Route: #P B3LYP/Gen Opt Freq GFInput

Atom Coordinates (x,y,z) in Angstrom

```

-----
N      0.000010  -0.297620  -0.016672
C     -1.215987  -1.080174   0.197040
C     -0.000015   0.991906   0.693427
C      1.216033  -1.080135   0.197047
C     -0.000061   2.202435  -0.236735
H      0.887593   2.199418  -0.887084
H     -0.887719   2.199361  -0.887078
H     -0.000089   3.140715   0.343648
H     -0.872682   1.043394   1.360669
H      0.872667   1.043444   1.360645
C      2.462794  -0.445731  -0.409061
H      3.332744  -1.106073  -0.263675
H      2.326983  -0.276958  -1.488248
H      2.704627   0.520943   0.059080
H      1.390860  -1.276717   1.275929
H      1.058371  -2.060047  -0.268119
C     -2.462769  -0.445798  -0.409056
H     -3.332701  -1.106160  -0.263654
H     -2.704616   0.520872   0.059085
H     -2.326978  -0.277025  -1.488245
H     -1.058297  -2.060075  -0.268138
H     -1.390809  -1.276772   1.275920
-----

```

```

Energy E(RB+HF-LYP)   -292.36995391 a.u.
                      -767617.31 kJ/mol

```

SCF Convergence: 0.2529D-08

&lt;S\*\*2&gt;: 0.0000

Charge: 0.0000

Maximum Force: 0.000004

```

ZPE-correction      :           0.203951 a.u.
                    535.47 kJ/mol

```

```

Energy (298K)       :   -292.156603 a.u.
                    -767057.16 kJ/mol

```

```

Enthalpy (298K)    :   -292.155659 a.u.
                    -767054.68 kJ/mol

```

```

Free Energy (298K) :   -292.199843 a.u.
                    -767170.69 kJ/mol

```

```

Lowest Frequency    57.2479 cm-1
=====

```

1

B3LYP/Iso-N/iso-n.log

Route: #P B3LYP/Gen Opt Freq GFInput

Atom Coordinates (x,y,z) in Angstrom

```

-----
C    2.561083    0.359464   -0.266811
O    1.618366   -0.710115   -0.290577
H    0.718078   -0.377820   -0.088836
C    2.702661    0.951577    1.135218
H    3.043636    0.179226    1.843188
H    3.428887    1.781113    1.145258
H    1.738585    1.344499    1.496708
C    3.876787   -0.192354   -0.795107
H    4.235824   -1.005386   -0.143981
H    4.648379    0.592951   -0.831888
H    3.743184   -0.600668   -1.808018
H    2.223865    1.161776   -0.948507
N   -1.202976    0.083789   -0.043453
C   -1.167675    1.530534   -0.317885
C   -1.686369   -0.693731   -1.196401
C   -1.879100   -0.252958    1.228426
C   -1.402360   -2.188478   -1.106173
H   -0.327984   -2.380056   -0.970409
H   -1.952152   -2.663893   -0.279565
H   -1.728193   -2.679160   -2.036959
H   -2.770050   -0.540775   -1.352183
H   -1.183364   -0.289990   -2.083240
H   -0.486823    1.683690   -1.164963
C   -2.502911    2.222256   -0.612999
H   -2.976389    1.829508   -1.525369
H   -3.217417    2.108263    0.217404
H   -2.338043    3.301227   -0.763245
H   -0.690109    2.011301    0.544726
C   -1.035908   -1.117159    2.162365
H   -1.595758   -1.335379    3.087099
H   -0.758061   -2.072407    1.696122
H   -0.104037   -0.601810    2.439210
H   -2.132707    0.678984    1.747392
H   -2.842693   -0.745710    1.025036
-----

```

```

Energy E(RB+HF-LYP)    -486.72235138 a.u.
                      -1277889.53 kJ/mol

```

SCF Convergence: 0.3492D-08

&lt;S\*\*2&gt;: 0.0000

Charge: 0.0000

Maximum Force: 0.000013

```

ZPE-correction      :           0.313413 a.u.
                    822.87 kJ/mol

```

```

Energy (298K)       :           -486.392568 a.u.
                    -1277023.69 kJ/mol

```

```

Enthalpy (298K)    :           -486.391623 a.u.
                    -1277021.21 kJ/mol

```

```

Free Energy (298K) :           -486.454049 a.u.
                    -1277185.11 kJ/mol

```

Lowest Frequency 25.5533 cm<sup>-1</sup>

=====

**Isopropanol**

B3LYP/Iso/iso.log

Route: #P B3LYP/Gen Opt Freq GFInput

Atom Coordinates (x,y,z) in Angstrom

```

-----
O   -0.048499   1.373987  -0.162294
H   -0.885379   1.773670   0.098531
C    0.002488   0.036909   0.360759
H   -0.006575   0.083603   1.463666
C   -1.197639  -0.782553  -0.102993
H   -1.217082  -0.850719  -1.202238
H   -1.160726  -1.803268   0.310705
H   -2.144314  -0.324381   0.230182
C    1.329148  -0.550617  -0.089038
H    1.371033  -0.604301  -1.188394
H    1.462727  -1.565363   0.317117
H    2.164320   0.076432   0.256414
-----

```

```

-----
Energy E(RB+HF-LYP)   -194.34383692 a.u.
                      -510249.74 kJ/mol
-----

```

SCF Convergence: 0.2600D-08

Maximum Force: 0.000032

```

ZPE-correction      :           0.107287 a.u.
                      281.68 kJ/mol
Energy (298K)       :       -194.231105 a.u.
                      -509953.77 kJ/mol
Enthalpy (298K)    :       -194.230161 a.u.
                      -509951.29 kJ/mol
Free Energy (298K):       -194.263926 a.u.
                      -510039.94 kJ/mol

```

Lowest Frequency 229.0518 cm-1

=====

**H<sub>2</sub>O**

B3LYP/H2O/h2o.log

Route: #P B3LYP/Gen Opt Freq GFInput

Atom Coordinates (x,y,z) in Angstrom

```

-----
O    0.000000   0.000000   0.117175
H    0.000000   0.764021  -0.468700
H    0.000000  -0.764021  -0.468700
-----

```

```

-----
Energy E(RB+HF-LYP)   -76.46062200 a.u.
                      -200747.36 kJ/mol
-----

```

SCF Convergence: 0.1195D-09

Maximum Force: 0.000101

```

ZPE-correction      :           0.021174 a.u.
                      55.59 kJ/mol
Energy (298K)       :       -76.436612 a.u.
                      -200684.32 kJ/mol
Enthalpy (298K)    :       -76.435668 a.u.
                      -200681.85 kJ/mol
Free Energy (298K):       -76.457093 a.u.
                      -200738.10 kJ/mol

```

Lowest Frequency 1604.1424 cm-1

=====

2

B3LYP/HFIP-N/hfip-n.log

Route: #P B3LYP/Gen Opt Geom=Check Freq GFInput

Atom Coordinates (x,y,z) in Angstrom

```

-----
C    1.274385    0.113090    0.284093
O    0.314829    0.692129   -0.534648
H   -0.612535    0.418253   -0.266552
C    1.594642   -1.328341   -0.162697
F    2.126856   -1.388410   -1.383100
F    2.422499   -1.943488    0.692015
F    0.444227   -2.039494   -0.183463
C    2.501469    1.038960    0.296586
F    2.966627    1.284783   -0.928475
F    3.498622    0.508664    1.023841
F    2.166384    2.207841    0.859529
H    0.955938    0.032239    1.335808
N   -2.293345    0.108371    0.159208
C   -2.899784    1.452489    0.259401
C   -2.948781   -0.763654   -0.850043
C   -2.194011   -0.542685    1.485952
C   -2.762438    2.308082   -0.993819
H   -1.711741    2.395844   -1.307318
H   -3.346977    1.907887   -1.835465
H   -3.144682    3.319321   -0.784433
H   -3.966768    1.377691    0.530164
H   -2.399931    1.959643    1.093351
H   -1.578648    0.110676    2.118165
C   -3.503739   -0.853650    2.214404
H   -4.071610    0.057596    2.453115
H   -4.154642   -1.518307    1.625847
H   -3.282465   -1.364063    3.165010
H   -1.621013   -1.465609    1.343401
C   -2.230941   -0.826231   -2.195680
H   -2.793079   -1.480581   -2.881824
H   -2.141002    0.161088   -2.667386
H   -1.218493   -1.237907   -2.083085
H   -2.994397   -1.777337   -0.438417
H   -3.994925   -0.449490   -0.989954
-----

```

```

Energy E(RB+HF-LYP)  -1081.72260509 a.u.
                    -2840062.70 kJ/mol

```

SCF Convergence: 0.2379D-08

&lt;S\*\*2&gt;: 0.0000

Charge: 0.0000

Maximum Force: 0.000013

```

ZPE-correction      :          0.268648 a.u.
                    705.34 kJ/mol

```

```

Energy (298K)       :   -1081.434055 a.u.
                    -2839305.11 kJ/mol

```

```

Enthalpy (298K)    :   -1081.433111 a.u.
                    -2839302.63 kJ/mol

```

```

Free Energy (298K) :   -1081.504770 a.u.
                    -2839490.77 kJ/mol

```

Lowest Frequency 22.8818 cm-1

=====

## HFIP

B3LYP/HFIP/hfip.log

Route: #P B3LYP/Gen Opt Freq GFInput

Atom Coordinates (x,y,z) in Angstrom

```

-----
O    0.043770    1.864947   -0.011233
H   -0.763426    2.317949   -0.281740
C    0.003809    0.545407   -0.485392
C    1.302204   -0.135546   -0.028289
C   -1.279022   -0.169107   -0.022844
H    0.000509    0.493857   -1.585459
F    1.298542   -1.425668   -0.394826
F    2.345694    0.459045   -0.615656
F    1.470160   -0.072680    1.290932
F   -1.437340   -1.341537   -0.640477
F   -1.323054   -0.367666    1.292647
F   -2.326134    0.617849   -0.357486
-----

```

```

-----
Energy E(RB+HF-LYP)   -789.33513004 a.u.
                      -2072399.38 kJ/mol
-----

```

SCF Convergence: 0.1429D-08

&lt;S\*\*2&gt;: 0.0000

Charge: 0.0000

Maximum Force: 0.000050

```

ZPE-correction      :           0.062429 a.u.
                      163.91 kJ/mol

```

```

Energy (298K)       :   -789.263581 a.u.
                      -2072211.53 kJ/mol

```

```

Enthalpy (298K)    :   -789.262636 a.u.
                      -2072209.05 kJ/mol

```

```

Free Energy (298K) :   -789.307881 a.u.
                      -2072327.84 kJ/mol

```

Lowest Frequency 40.4075 cm-1

=====

5

B3LYP/W-CO/wco.log

Route: #N B3LYP/GenECP Freq

```

-----
W   1.841208   0.144843   0.002229
H   2.199943   0.239464  -1.793679
C   3.523551   1.338252   0.193403
N   1.494869   0.052894   1.834288
C   0.255366  -1.013138  -0.532692
O   4.460795   1.997957   0.271165
O   1.282314  -0.010308   2.996777
O  -0.638388  -1.678462  -0.859347
P   0.515210   2.223350  -0.588729
P   3.339712  -1.876794  -0.218431
C  -0.396754   2.998427   0.813335
C   1.493817   3.631951  -1.270018
C  -0.798062   2.018649  -1.866877
C   5.108300  -1.560789  -0.641656
C   2.851967  -3.094169  -1.515909
C   3.470617  -2.925451   1.294341
H  -1.122832   2.273969   1.207168
H   0.313323   3.246139   1.615621
H  -0.926704   3.910009   0.494992
H   2.235933   3.960967  -0.528168
H   0.841932   4.480517  -1.530005
H   2.030599   3.294502  -2.168481
H  -1.261613   2.985886  -2.116487
H  -1.578438   1.338231  -1.497036
H  -0.353613   1.582040  -2.772859
H   5.668908  -2.501963  -0.753412
H   5.573726  -0.954785   0.149219
H   5.155878  -0.993717  -1.582616
H   2.823734  -2.583875  -2.489411
H   1.843963  -3.477120  -1.299797
H   3.558598  -3.937596  -1.561522
H   2.469182  -3.284252   1.573329
H   4.136596  -3.788275   1.134753
H   3.854478  -2.315334   2.124946
H  -2.518108  -1.200775  -1.091355
O  -3.379182  -0.771406  -1.209204
C  -4.154923  -0.930108  -0.056986
H  -4.037269  -1.922625   0.401998
C  -5.628364  -0.828417  -0.482584
C  -3.744956   0.090022   1.024260
F  -5.927887  -1.851798  -1.289621
F  -5.887904   0.307233  -1.131307
F  -6.434650  -0.896010   0.587125
F  -3.961270   1.354356   0.649514
F  -2.421858  -0.041859   1.254830
F  -4.381226  -0.126588   2.178169
-----

```

Energy E(RB+HF-LYP) -2135.97770970 a.u.  
-5608009.48 kJ/mol

SCF Convergence: 0.9023D-08

Maximum Force: 0.000068

ZPE-correction : 0.322300 a.u.  
846.20 kJ/mol

Energy (298K) : -2135.620520 a.u.

Enthalpy (298K) : -2135.619576 a.u.

Free Energy (298K): -2135.728871 a.u.

Lowest Frequency 11.6201 cm-1

=====

3'

B3LYP/W-H/wh.log

Route: #N B3LYP/GenECP Freq

```

-----
W   -1.553003  -0.086269  -0.069731
H    0.039186   0.302052   0.774251
C   -0.500973  -0.064146  -1.841359
N   -3.193795  -0.364009  -0.896369
C   -2.344003  -0.072505   1.837392
O    0.102080  -0.044210  -2.821044
O   -4.244975  -0.507729  -1.420489
O   -2.769156  -0.068873   2.905036
P   -1.625663   2.446428  -0.104727
P   -0.954619  -2.533138   0.293869
C   -0.212139   3.300585  -0.927258
H   -0.343142   4.393882  -0.908747
H   -0.135242   2.964350  -1.971655
H    0.719970   3.039695  -0.406140
C   -3.092216   3.148033  -0.974624
H   -3.089294   4.249046  -0.951248
H   -3.090579   2.804130  -2.019301
H   -4.009534   2.773448  -0.497603
C   -1.679751   3.287667   1.535871
H   -1.676895   4.383163   1.424302
H   -0.806377   2.979574   2.128773
H   -2.588213   2.981202   2.074647
C   -0.225825  -2.956239   1.934134
H   -0.901642  -2.628675   2.737478
H    0.734483  -2.432425   2.046894
H   -0.057978  -4.041065   2.020620
C    0.238440  -3.320529  -0.870946
H   -0.133292  -3.223245  -1.901299
H    1.210554  -2.812322  -0.797923
H    0.373401  -4.387636  -0.634227
C   -2.421603  -3.646487   0.188616
H   -2.142002  -4.698427   0.357078
H   -2.882866  -3.544549  -0.804578
H   -3.163398  -3.340681   0.940706
H    1.416030  -0.220284   0.895264
O    2.348966  -0.543498   0.963301
C    3.122812   0.108957   0.005210
C    3.700835   1.424444   0.563955
C    4.191106  -0.879759  -0.485352
H    2.541893   0.394096  -0.884899
F    4.563387   1.231791   1.561436
F    2.685136   2.176786   1.034953
F    4.312245   2.136052  -0.393595
F    4.913184  -1.385089   0.514313
F    3.588894  -1.901416  -1.119309
F    5.027435  -0.299049  -1.357030
-----

```

Energy E(RB+HF-LYP) -2135.98446237 a.u.  
-5608027.21 kJ/mol

SCF Convergence: 0.8611D-08

Maximum Force: 0.000314

ZPE-correction : 0.322483 a.u.  
846.68 kJ/mol

Energy (298K) : -2135.627275 a.u.

Enthalpy (298K) : -2135.626330 a.u.

Free Energy (298K): -2135.735075 a.u.

Lowest Frequency 6.9454 cm-1

=====



3

B3LYP/W-H/whfixb3lypf.log

Route: # B3LYP/GenECP/Auto GFInput Int=UltraFine Freq

```

-----
W   -1.528302    0.000171   -0.080893
H    0.138915   -0.000169    0.694412
C   -0.534719   -0.000066   -1.888915
N   -3.215897    0.000443   -0.858528
C   -2.247918    0.000339    1.851474
O    0.036384   -0.000186   -2.886610
O   -4.289560    0.000501   -1.355718
O   -2.632581    0.000365    2.935171
P   -1.246670    2.516492    0.096251
P   -1.247785   -2.516275    0.096447
C   -0.274495    3.366712   -1.221913
H   -0.247576    4.455316   -1.057089
H   -0.724521    3.159708   -2.203685
H    0.754684    2.979957   -1.218724
C   -2.838334    3.448818    0.086032
H   -2.667730    4.534123    0.161973
H   -3.382123    3.228119   -0.844176
H   -3.460126    3.117304    0.930470
C   -0.417490    3.118303    1.629144
H   -0.390353    4.218819    1.658061
H    0.610924    2.730041    1.656391
H   -0.954589    2.744867    2.513108
C   -0.421009   -3.118552    1.630466
H   -0.959225   -2.745040    2.513719
H    0.607505   -2.730675    1.659203
H   -0.394303   -4.219082    1.659297
C   -0.274097   -3.366743   -1.220434
H   -0.722653   -3.159495   -2.202828
H    0.755211   -2.980395   -1.215733
H   -0.247826   -4.455369   -1.055663
C   -2.839772   -3.448009    0.083928
H   -2.669686   -4.533381    0.160061
H   -3.382153   -3.227058   -0.847040
H   -3.462641   -3.116300    0.927496
H    1.471237   -0.000440    1.313982
O    2.448565   -0.000012    1.448565
C    3.036820   -0.000238    0.184578
C    3.849615    1.291659    0.000499
C    3.849126   -1.292453    0.000146
H    2.286757    0.000054   -0.619259
F    4.805084    1.433743    0.918009
F    3.014453    2.346483    0.104976
F    4.416585    1.350699   -1.212352
F    4.805811   -1.434214    0.916482
F    3.014000   -2.347091    0.106323
F    4.414501   -1.352270   -1.213435
-----

```

Energy E(RB+HF-LYP) -2135.98481060 a.u.  
-5608028.12 kJ/mol

SCF Convergence: 0.7513D-08

Maximum Force: 0.000218

ZPE-correction : 0.322051 a.u.  
845.54 kJ/mol

Energy (298K) : -2135.627825 a.u.

Enthalpy (298K) : -2135.626881 a.u.

Free Energy (298K): -2135.737180 a.u.

Lowest Frequency 4.7093 cm-1

=====

7

B3LYP/W-Iso/wisob3.log

Route: #P B3LYP/GenECP Freq

```

-----
W    0.726907    0.274053   -0.021859
H   -0.763076   -0.785504    0.227630
C    0.336523    0.064004   -2.036910
N    2.282725    1.259899   -0.274419
C    0.830357    0.313648    2.036345
O    0.106623   -0.066100   -3.155885
O    3.290644    1.861402   -0.438265
O    0.868781    0.324781    3.186147
P    1.800474   -2.013706   -0.014376
P   -0.894100    2.233028    0.080986
C    1.214404   -3.201383   -1.300446
H    1.717026   -4.176802   -1.206379
H    1.411815   -2.787678   -2.300161
H    0.128489   -3.338258   -1.194495
C    3.627097   -2.011032   -0.271584
H    4.041068   -3.031498   -0.261446
H    3.854162   -1.532424   -1.235313
H    4.101620   -1.414469    0.521074
C    1.611843   -3.007839    1.529528
H    2.083499   -3.998178    1.430595
H    0.541300   -3.132635    1.747511
H    2.072285   -2.469842    2.370959
C   -2.043857    2.271007    1.521569
H   -1.469091    2.238572    2.458588
H   -2.698850    1.388846    1.470762
H   -2.661703    3.182640    1.505661
C   -2.052053    2.454432   -1.336026
H   -1.479891    2.558130   -2.269425
H   -2.694904    1.564218   -1.404408
H   -2.680974    3.347455   -1.193958
C   -0.044235    3.867613    0.183055
H   -0.769974    4.695371    0.219576
H    0.610108    3.991797   -0.692068
H    0.585972    3.893957    1.083925
H   -2.435561   -0.694525   -0.006492
O   -3.388371   -0.522082   -0.129386
C   -4.091209   -1.767806   -0.194908
C   -3.973801   -2.537179    1.118943
C   -5.532132   -1.446668   -0.558196
H   -3.655536   -2.382076   -1.002114
H   -4.410887   -1.954150    1.945360
H   -2.918294   -2.738038    1.363406
H   -4.498489   -3.504872    1.058513
H   -5.992061   -0.819760    0.222462
H   -5.577031   -0.897350   -1.510488
H   -6.125854   -2.368781   -0.658995
-----

```

Energy E(RB+HF-LYP) -1540.98556231 a.u.  
-4045857.59 kJ/mol

SCF Convergence: 0.9291D-08

Maximum Force: 0.000005

ZPE-correction : 0.367655 a.u.  
965.28 kJ/mol

Energy (298K) : -1540.586953 a.u.

Enthalpy (298K) : -1540.586009 a.u.

Free Energy (298K): -1540.684775 a.u.

Lowest Frequency 12.9973 cm-1

=====

4

B3LYP/W-NO/wno.log

Route: #P B3LYP/GenECP GFInput Freq

```

-----
W   -1.680135    0.166761   -0.022118
H   -3.019735    1.171847    0.727841
C   -1.239079   -0.200142    1.962691
N   -0.351239   -0.908552   -0.726354
C   -2.448246    0.814998   -1.819983
O   -1.031888   -0.376140    3.077577
O    0.500679   -1.641371   -1.162708
O   -2.903069    1.200350   -2.803883
P   -0.423975    2.374591    0.115691
P   -3.524311   -1.560623    0.066345
C   -1.480043    3.861412   -0.155757
H   -1.961423    3.794737   -1.142298
H   -2.269097    3.885940    0.609140
H   -0.883253    4.785524   -0.104772
C    0.436525    2.785133    1.695029
H   -0.283157    2.757799    2.526093
H    0.895978    3.784802    1.645238
H    1.221220    2.039528    1.884575
C    0.914842    2.579924   -1.133021
H    1.383660    3.573237   -1.051276
H    1.680443    1.803913   -0.986602
H    0.491542    2.459690   -2.140932
C   -5.192508   -0.971962   -0.453628
C   -3.882612   -2.337534    1.701540
C   -3.245147   -3.025206   -1.020059
H   -5.937472   -1.780799   -0.394394
H   -5.495984   -0.141096    0.199068
H   -5.145369   -0.597468   -1.486481
H   -4.706514   -3.064774    1.629391
H   -2.980218   -2.847376    2.069160
H   -4.152791   -1.553258    2.423629
H   -4.069792   -3.750989   -0.941277
H   -3.152306   -2.689431   -2.063222
H   -2.300362   -3.511262   -0.736056
H    2.102020   -0.866118   -1.281296
O    2.950067   -0.375434   -1.250293
C    3.785750   -0.948766   -0.292330
H    3.602215   -2.024814   -0.159009
C    5.232850   -0.821090   -0.794737
C    3.544844   -0.304312    1.087074
F    6.099113   -1.307222    0.108103
F    5.374580   -1.528718   -1.920712
F    5.567717    0.445362   -1.051299
F    4.269690   -0.886053    2.048073
F    3.811272    1.008100    1.094532
F    2.244736   -0.450754    1.412158
-----

```

Energy E(RB+HF-LYP) -2135.98411537 a.u.  
-5608026.29 kJ/mol

SCF Convergence: 0.8445D-08

Maximum Force: 0.000040

ZPE-correction : 0.322561 a.u.  
846.88 kJ/mol

Energy (298K) : -2135.626886 a.u.

Enthalpy (298K) : -2135.625942 a.u.

Free Energy (298K): -2135.735181 a.u.

Lowest Frequency 6.4944 cm-1

=====

6

B3LYP/W-Water/wwb3.log

Route: #P B3LYP/GenECP Freq

Atom Coordinates (x,y,z) in Angstrom

```

-----
W   -0.087188  -0.158047  -0.080268
H   -0.022044   1.291190   1.061202
C   -0.031252   1.224299  -1.611608
N   -0.243443  -1.625773  -1.209456
C   -0.104074  -1.271206   1.653620
O   -0.005404   2.006532  -2.453508
O   -0.366324  -2.561310  -1.926357
O   -0.108858  -1.871472   2.635096
P   -2.555936   0.304436   0.215802
P    2.456432  -0.155451   0.026597
C   -3.160353   1.946992  -0.372937
H   -4.238006   2.071648  -0.183460
H   -2.969216   2.042909  -1.451677
H   -2.604492   2.741631   0.145566
C   -3.685530  -0.869504  -0.650745
H   -4.743100  -0.609962  -0.485910
H   -3.468517  -0.852617  -1.728728
H   -3.498285  -1.889514  -0.284731
C   -3.187773   0.267599   1.949649
H   -4.260836   0.511113   1.993823
H   -2.621453   0.993311   2.551085
H   -3.025048  -0.732467   2.377365
C    3.212738   0.050003   1.695386
H    2.819680  -0.716863   2.378629
H    2.949567   1.044657   2.084192
H    4.309161  -0.039824   1.640988
C    3.352743   1.115989  -0.962384
H    3.068572   1.027234  -2.021132
H    3.064560   2.112160  -0.595171
H    4.443194   0.993654  -0.866700
C    3.191574  -1.738931  -0.570967
H    4.291543  -1.713747  -0.521367
H    2.875437  -1.917454  -1.609016
H    2.817072  -2.569521   0.044931
H    1.086538   2.536162   1.191683
O    1.793914   3.196090   1.331038
H    1.339162   4.007249   1.578202
-----

```

```

Energy E(RB+HF-LYP)  -1423.10340153 a.u.
                    -3736357.98 kJ/mol

```

SCF Convergence: 0.7732D-08

Maximum Force: 0.000566

```

ZPE-correction      :           0.282592 a.u.
                    741.95 kJ/mol

```

```

Energy (298K)       :   -1422.793487 a.u.
                    -3735544.30 kJ/mol

```

```

Enthalpy (298K)    :   -1422.792543 a.u.
                    -3735541.82 kJ/mol

```

```

Free Energy (298K) :   -1422.881482 a.u.
                    -3735775.33 kJ/mol

```

```

Lowest Frequency    9.8647 cm-1
=====

```

WH(CO)<sub>2</sub>(NO)(PMe<sub>3</sub>)<sub>2</sub>

B3LYP/W/w.log

Route: #P B3LYP/GenECP Freq

Atom Coordinates (x,y,z) in Angstrom

```

-----
W      0.000003   0.025119   0.022029
H     -0.000054   0.034256  -1.810381
C     -0.000054   2.067188  -0.254483
C      0.000054  -2.018076  -0.203946
N      0.000000   0.044735   1.885675
O     -0.000111   3.198218  -0.463661
O      0.000107  -3.157124  -0.378015
O     -0.000031   0.067180   3.071788
P      2.510394  -0.019290  -0.275993
P     -2.510391  -0.019339  -0.275993
C      3.116774  -0.808103  -1.828910
C      3.396709   1.601185  -0.292220
C      3.426024  -0.942522   1.034978
C     -3.396765   1.601105  -0.292241
C     -3.116748  -0.808166  -1.828910
C     -3.425985  -0.942592   1.034987
H      4.513685  -0.920026   0.862265
H      3.202145  -0.494038   2.014100
H      3.081652  -1.986896   1.052161
H      4.483382   1.467437  -0.412338
H      3.013819   2.217836  -1.118607
H      3.197489   2.130667   0.651026
H      4.217280  -0.813037  -1.874708
H      2.744434  -1.841569  -1.882753
H      2.711688  -0.256579  -2.689175
H     -4.217255  -0.813194  -1.874673
H     -2.711742  -0.256576  -2.689171
H     -2.744320  -1.841598  -1.882802
H     -4.483426   1.467309  -0.412410
H     -3.197617   2.130594   0.651016
H     -3.013867   2.217779  -1.118607
H     -4.513652  -0.920089   0.862310
H     -3.081613  -1.986966   1.052138
H     -3.202070  -0.494130   2.014110
-----

```

```

Energy E(RB+HF-LYP)  -1346.63146137 a.u.
                    -3535580.90 kJ/mol

```

SCF Convergence: 0.9767D-08

&lt;S\*\*2&gt;: 0.0000

Charge: 0.0000

Maximum Force: 0.000298

```

ZPE-correction      :           0.258455 a.u.
                    678.57 kJ/mol

```

```

Energy (298K)       :   -1346.349059 a.u.
                    -3534839.45 kJ/mol

```

```

Enthalpy (298K)    :   -1346.348115 a.u.
                    -3534836.98 kJ/mol

```

```

Free Energy (298K) :   -1346.429077 a.u.
                    -3535049.54 kJ/mol

```

Lowest Frequency 12.0426 cm<sup>-1</sup>

=====

**NEt<sub>3</sub>**

TPSS/N/n.log

Route: #P TPSS/TPSS/Gen Opt Freq GFInput

Atom Coordinates (x,y,z) in Angstrom

```

-----
N    0.000039  -0.296085  -0.038068
C   -1.218303  -1.085146   0.197158
C   -0.000034   0.993225   0.692539
C    1.218451  -1.085027   0.197189
C   -0.000206   2.211673  -0.234661
H    0.890522   2.209671  -0.885207
H   -0.890998   2.209511  -0.885118
H   -0.000266   3.147858   0.354108
H   -0.879166   1.033783   1.359740
H    0.879197   1.033945   1.359594
C    2.471087  -0.446489  -0.403954
H    3.344148  -1.103530  -0.243227
H    2.342326  -0.285818  -1.487678
H    2.699509   0.526946   0.064134
H    1.382980  -1.273410   1.283723
H    1.057686  -2.069351  -0.268315
C   -2.471015  -0.446708  -0.403927
H   -3.343994  -1.103863  -0.243218
H   -2.699544   0.526670   0.064226
H   -2.342303  -0.285962  -1.487646
H   -1.057450  -2.069433  -0.268394
H   -1.382804  -1.273593   1.283687
-----

```

```

Energy E(RTPSS-TPSS)  -292.41764802 a.u.
                      -767742.53 kJ/mol

```

SCF Convergence: 0.2627D-08

&lt;S\*\*2&gt;: 0.0000

Charge: 0.0000

Maximum Force: 0.000033

```

ZPE-correction      :          0.201522 a.u.
                    529.10 kJ/mol

```

```

Energy (298K)       :   -292.206556 a.u.
                    -767188.31 kJ/mol

```

```

Enthalpy (298K)    :   -292.205612 a.u.
                    -767185.83 kJ/mol

```

```

Free Energy (298K) :   -292.250107 a.u.
                    -767302.66 kJ/mol

```

```

Lowest Frequency    57.9195 cm-1
=====

```

1

TPSS/Iso-N/iso-n.log

Route: #P TPSS/Gen Opt Freq GFInput

Atom Coordinates (x,y,z) in Angstrom

```

-----
C   2.559875   0.364901  -0.278378
O   1.615438  -0.716733  -0.250930
H   0.704081  -0.363952  -0.074897
C   2.719234   1.007342   1.105910
H   3.068915   0.256154   1.835923
H   3.448737   1.837600   1.076772
H   1.756710   1.413934   1.464477
C   3.872923  -0.210055  -0.803878
H   4.237414  -1.002117  -0.126278
H   4.645891   0.575395  -0.875408
H   3.724733  -0.652719  -1.802984
H   2.209914   1.143700  -0.987442
N  -1.177753   0.085076  -0.045518
C  -1.190829   1.540083  -0.334826
C  -1.677753  -0.704744  -1.195427
C  -1.863220  -0.247596   1.234986
C  -1.393585  -2.202622  -1.086289
H  -0.316004  -2.391263  -0.951930
H  -1.943793  -2.663268  -0.247693
H  -1.726721  -2.703741  -2.011938
H  -2.766960  -0.548971  -1.339694
H  -1.175401  -0.304401  -2.089618
H  -0.524122   1.699970  -1.197150
C  -2.555705   2.188702  -0.616231
H  -3.026327   1.776504  -1.524771
H  -3.254592   2.050041   0.227112
H  -2.424954   3.274541  -0.769296
H  -0.715711   2.038902   0.524183
C  -1.014791  -1.112637   2.170626
H  -1.577078  -1.327305   3.097801
H  -0.739406  -2.070830   1.702740
H  -0.080776  -0.593597   2.442743
H  -2.110223   0.694791   1.747771
H  -2.830452  -0.741270   1.026694
-----

```

```

Energy E(RTPSS-TPSS)   -486.79577910 a.u.
                        -1278082.32 kJ/mol

```

SCF Convergence: 0.1486D-08

&lt;S\*\*2&gt;: 0.0000

Charge: 0.0000

Maximum Force: 0.000003

```

ZPE-correction      :           0.309576 a.u.
                    :           812.79 kJ/mol

```

```

Energy (298K)       :   -486.469587 a.u.
                    : -1277225.90 kJ/mol

```

```

Enthalpy (298K)    :   -486.468643 a.u.
                    : -1277223.42 kJ/mol

```

```

Free Energy (298K):   -486.531361 a.u.
                    : -1277388.09 kJ/mol

```

Lowest Frequency 23.4194 cm-1

=====

**Isopropanol**

TPSS/Iso/iso.log

Route: #P TPSS/Gen Opt Freq GFInput

Atom Coordinates (x,y,z) in Angstrom

```

-----
O   -0.031595   1.381561  -0.162609
H   -0.877286   1.779658   0.098821
C    0.002278   0.032815   0.364909
H   -0.006823   0.080886   1.471962
C   -1.211019  -0.773425  -0.104950
H   -1.228366  -0.837341  -1.206888
H   -1.184827  -1.797848   0.308048
H   -2.153448  -0.302205   0.230825
C    1.328123  -0.564889  -0.090480
H    1.365528  -0.618197  -1.192394
H    1.452936  -1.582926   0.317357
H    2.168758   0.058469   0.256267
-----

```

```

Energy E(RTPSS-TPSS)  -194.36886528 a.u.
                      -510315.46 kJ/mol

```

SCF Convergence: 0.2204D-08

Maximum Force: 0.000026

```

ZPE-correction      :      0.105990 a.u.
                    278.28 kJ/mol

```

```

Energy (298K)       :      -194.257327 a.u.
                    -510022.61 kJ/mol

```

```

Enthalpy (298K)    :      -194.256383 a.u.
                    -510020.13 kJ/mol

```

```

Free Energy (298K):      -194.290346 a.u.
                    -510109.30 kJ/mol

```

Lowest Frequency 223.7991 cm<sup>-1</sup>

=====

**H<sub>2</sub>O**

TPSS/H2O/h2o.log

Route: #P TPSS/Gen/Auto Opt Freq GFInput

Atom Coordinates (x,y,z) in Angstrom

```

-----
O    0.000000   0.000000   0.119007
H    0.000000   0.765320  -0.476030
H    0.000000  -0.765320  -0.476030
-----

```

```

Energy E(RTPSS-TPSS)  -76.46175897 a.u.
                      -200750.35 kJ/mol

```

SCF Convergence: 0.3471D-09

Maximum Force: 0.000082

```

ZPE-correction      :      0.020791 a.u.
                    54.59 kJ/mol

```

```

Energy (298K)       :      -76.438132 a.u.
                    -200688.32 kJ/mol

```

```

Enthalpy (298K)    :      -76.437188 a.u.
                    -200685.84 kJ/mol

```

```

Free Energy (298K):      -76.458635 a.u.
                    -200742.15 kJ/mol

```

Lowest Frequency 1609.7323 cm<sup>-1</sup>

=====



2

TPSS/HFIP-N/hfip-n.log

Route: #P TPSS/TPSS/Gen Opt Freq GFInput

Atom Coordinates (x,y,z) in Angstrom

```

-----
C   -1.272561   0.102756  -0.279562
O   -0.306344   0.661475   0.560196
H    0.631276   0.391472   0.265050
C   -1.628885  -1.338925   0.159445
F   -2.164805  -1.399255   1.388963
F   -2.477145  -1.937183  -0.704910
F   -0.486053  -2.083611   0.174782
C   -2.482433   1.058897  -0.300913
F   -2.958076   1.318565   0.928049
F   -3.494346   0.552114  -1.044767
F   -2.112154   2.230332  -0.863522
H   -0.941955   0.019185  -1.331666
N    2.280490   0.102131  -0.159375
C    2.895914   1.451300  -0.278856
C    2.953933  -0.758781   0.863066
C    2.215820  -0.571064  -1.489234
C    2.758041   2.320080   0.970545
H    1.704241   2.410883   1.281231
H    3.344504   1.921406   1.815490
H    3.144658   3.329914   0.749304
H    3.966888   1.365018  -0.547395
H    2.391394   1.945531  -1.123379
H    1.610530   0.078591  -2.141688
C    3.549768  -0.883342  -2.181774
H    4.117261   0.032483  -2.416062
H    4.188152  -1.538723  -1.564682
H    3.352033  -1.407561  -3.132972
H    1.643955  -1.498764  -1.341528
C    2.240473  -0.799554   2.216746
H    2.808480  -1.448027   2.907699
H    2.158170   0.198301   2.673780
H    1.223890  -1.209681   2.111967
H    2.993405  -1.780323   0.458137
H    4.003241  -0.433278   0.986638
-----

```

```

Energy E(RTPSS-TPSS)  -1081.83618221 a.u.
                      -2840360.90 kJ/mol

```

SCF Convergence: 0.4924D-08

&lt;S\*\*2&gt;: 0.0000

Charge: 0.0000

Maximum Force: 0.000090

```

ZPE-correction      :           0.263993 a.u.
                    :           693.11 kJ/mol

```

```

Energy (298K)       :   -1081.551815 a.u.
                    :   -2839614.29 kJ/mol

```

```

Enthalpy (298K)    :   -1081.550871 a.u.
                    :   -2839611.81 kJ/mol

```

```

Free Energy (298K) :   -1081.623772 a.u.
                    :   -2839803.21 kJ/mol

```

```

Lowest Frequency    21.9793 cm-1
=====

```

## HFIP

TPSS/HFIP/hfip.log

Route: #P TPSS/TPSS/Gen Opt Freq GFInput

Atom Coordinates (x,y,z) in Angstrom

```

-----
O    0.044006   1.872149  -0.015583
H   -0.794629   2.297365  -0.260877
C    0.004871   0.541307  -0.490921
C    1.309100  -0.135068  -0.028308
C   -1.282921  -0.171320  -0.022722
H    0.000452   0.487695  -1.595267
F    1.304098  -1.440061  -0.381741
F    2.358869   0.455560  -0.632803
F    1.487449  -0.055735   1.298237
F   -1.460023  -1.345903  -0.652538
F   -1.327595  -0.379558   1.300651
F   -2.334373   0.635500  -0.350417
-----

```

```

-----
Energy E(RTPSS-TPSS)  -789.40023733 a.u.
                      -2072570.32 kJ/mol
-----

```

SCF Convergence: 0.1385D-08

&lt;S\*\*2&gt;: 0.0000

Charge: 0.0000

Maximum Force: 0.000004

```

ZPE-correction      :          0.060509 a.u.
                    :          158.87 kJ/mol

```

```

Energy (298K)       :   -789.330356 a.u.
                    : -2072386.85 kJ/mol

```

```

Enthalpy (298K)    :   -789.329412 a.u.
                    : -2072384.37 kJ/mol

```

```

Free Energy (298K) :   -789.375216 a.u.
                    : -2072504.63 kJ/mol

```

Lowest Frequency 40.6905 cm-1

=====

5

TPSS/W-CO/wco.log

Route: #N TPSSTPSS/GenECP Freq

```

-----
W    1.851784    0.136424    0.009833
H    2.208710    0.218090   -1.782924
C    3.547293    1.301261    0.187992
N    1.495057    0.060260    1.853543
C    0.255279   -1.003692   -0.530149
O    4.506008    1.953208    0.255067
O    1.271019    0.008264    3.022303
O   -0.650319   -1.669798   -0.865200
P    0.578382    2.222922   -0.600330
P    3.309224   -1.895673   -0.209757
C   -0.257091    3.085832    0.806852
C    1.583450    3.574353   -1.368121
C   -0.790633    2.027098   -1.828414
C    5.089698   -1.606526   -0.626784
C    2.806059   -3.099605   -1.521881
C    3.419988   -2.963969    1.298607
H   -0.995157    2.400467    1.252756
H    0.495449    3.335282    1.572756
H   -0.765242    4.006996    0.471023
H    2.363646    3.901190   -0.661334
H    0.948262    4.436331   -1.636993
H    2.075472    3.180587   -2.272442
H   -1.222330    3.007064   -2.097115
H   -1.583449    1.390514   -1.404209
H   -0.392054    1.539923   -2.733244
H    5.633281   -2.559985   -0.746277
H    5.561796   -1.014357    0.174193
H    5.145836   -1.029974   -1.564615
H    2.787210   -2.576404   -2.491771
H    1.789961   -3.469493   -1.307515
H    3.504405   -3.953336   -1.571648
H    2.407821   -3.304901    1.571579
H    4.071212   -3.839712    1.129200
H    3.816946   -2.364511    2.134319
H   -2.525405   -1.191397   -1.052651
O   -3.399132   -0.778918   -1.202419
C   -4.184609   -0.916044   -0.041676
H   -4.065294   -1.901477    0.441481
C   -5.658409   -0.828661   -0.486211
C   -3.783266    0.134344    1.022029
F   -5.951483   -1.884301   -1.271615
F   -5.918556    0.293884   -1.176461
F   -6.482438   -0.867474    0.584900
F   -3.980724    1.400627    0.609823
F   -2.453997   -0.004363    1.279250
F   -4.441660   -0.045616    2.182191
-----

```

Energy E(RTPSS-TPSS) -2136.18135171 a.u.  
-5608544.14 kJ/mol

SCF Convergence: 0.4698D-08

Maximum Force: 0.000083

ZPE-correction : 0.317771 a.u.  
834.31 kJ/mol

Energy (298K) : -2135.828124 a.u.

Enthalpy (298K) : -2135.827180 a.u.

Free Energy (298K): -2135.937917 a.u.

Lowest Frequency 10.8126 cm-1

=====

3'

TPSS/W-H/wh.log

Route: #N TPSSTPSS/GenECP Freq

```

-----
W   -1.550865   -0.075501   -0.075509
H    0.057868    0.290984    0.733596
C   -0.526224   -0.087222   -1.859766
N   -3.220254   -0.331198   -0.881474
C   -2.305839   -0.030949    1.839725
O    0.067944   -0.086898   -2.858979
O   -4.287246   -0.462125   -1.393906
O   -2.714461   -0.009010    2.926888
P   -1.570592    2.442800   -0.111975
P   -1.004085   -2.514667    0.304146
C   -0.213866    3.280201   -1.052772
H   -0.327925    4.377883   -1.017565
H   -0.232368    2.944566   -2.102671
H    0.754838    3.001185   -0.608101
C   -3.094732    3.187088   -0.852517
H   -3.053872    4.290240   -0.833681
H   -3.194945    2.838641   -1.893576
H   -3.976131    2.840560   -0.288381
C   -1.460649    3.282684    1.532784
H   -1.460746    4.380740    1.418923
H   -0.531750    2.964645    2.033883
H   -2.316383    2.978914    2.157685
C   -0.283621   -2.943468    1.953268
H   -0.959875   -2.599207    2.752782
H    0.686826   -2.433116    2.064473
H   -0.135778   -4.033839    2.041560
C    0.173507   -3.345449   -0.855462
H   -0.197790   -3.244455   -1.888416
H    1.159068   -2.858055   -0.782727
H    0.278429   -4.416011   -0.606471
C   -2.498175   -3.603624    0.212157
H   -2.236778   -4.660139    0.398846
H   -2.953187   -3.506466   -0.787247
H   -3.234759   -3.267841    0.960424
H    1.389977   -0.238889    0.858356
O    2.329444   -0.577220    0.943583
C    3.119834    0.083917   -0.009561
C    3.696147    1.400867    0.564001
C    4.194987   -0.911246   -0.486755
H    2.547381    0.373483   -0.908485
F    4.567565    1.206054    1.566523
F    2.669437    2.151082    1.047037
F    4.306647    2.133038   -0.394401
F    4.883356   -1.451620    0.531393
F    3.597628   -1.920835   -1.166227
F    5.074274   -0.321620   -1.326447
-----

```

Energy E(RTPSS-TPSS) -2136.18914435 a.u.  
-5608564.60 kJ/mol

SCF Convergence: 0.5722D-08

Maximum Force: 0.000039

ZPE-correction : 0.318220 a.u.  
835.49 kJ/mol

Energy (298K) : -2135.835810 a.u.

Enthalpy (298K) : -2135.834866 a.u.

Free Energy (298K): -2135.943540 a.u.

Lowest Frequency 13.8072 cm-1

=====

3

TPSS/W-H/whfixtpssf.log

Route: # TPSS/TPSS/GenECP/Auto GFInput Int=UltraFine Freq

```

-----
W   -1.524760  -0.000140  -0.083977
H    0.145806   0.000174   0.675929
C   -0.529172  -0.000078  -1.886449
N   -3.229212  -0.000783  -0.855723
C   -2.214565  -0.000128   1.854185
O    0.055911  -0.000047  -2.890215
O   -4.312748  -0.001313  -1.349675
O   -2.580614  -0.000127   2.957356
P   -1.262368   2.503103   0.094265
P   -1.261180  -2.503232   0.094778
C   -0.357984   3.379152  -1.262938
H   -0.336954   4.469131  -1.087888
H   -0.854978   3.171251  -2.224654
H    0.675605   2.999987  -1.310213
C   -2.866843   3.423707   0.162736
H   -2.699837   4.512098   0.244074
H   -3.447962   3.206906  -0.748767
H   -3.446361   3.073869   1.032859
C   -0.375224   3.104292   1.601472
H   -0.355347   4.207651   1.632641
H    0.657045   2.718967   1.586989
H   -0.881623   2.720378   2.502264
C   -0.372477  -3.103630   1.601372
H   -0.878188  -2.719612   2.502506
H    0.659644  -2.717958   1.585838
H   -0.352208  -4.206972   1.632847
C   -0.357606  -3.379236  -1.262990
H   -0.855476  -3.171710  -2.224334
H    0.675803  -2.999695  -1.311189
H   -0.336030  -4.469171  -1.087733
C   -2.865237  -3.424450   0.164867
H   -2.697755  -4.512761   0.246313
H   -3.447257  -3.208091  -0.746169
H   -3.444116  -3.074630   1.035421
H    1.442419   0.000418   1.265731
O    2.428035  -0.000826   1.431353
C    3.040649   0.000098   0.166776
C    3.861390   1.296767   0.000767
C    3.862296  -1.295826  -0.000353
H    2.299667   0.000189  -0.650834
F    4.803126   1.444145   0.946039
F    3.018428   2.361644   0.087078
F    4.459492   1.360762  -1.209199
F    4.803614  -1.443709   0.945261
F    3.020009  -2.361357   0.084196
F    4.461114  -1.357943  -1.210057
-----

```

Energy E(RTPSS-TPSS) -2136.19565256 a.u.  
-5608581.69 kJ/mol

SCF Convergence: 0.7416D-08

Maximum Force: 0.000247

ZPE-correction : 0.317411 a.u.  
833.36 kJ/mol

Energy (298K) : -2135.842773 a.u.

Enthalpy (298K) : -2135.841829 a.u.

Free Energy (298K): -2135.951985 a.u.

Lowest Frequency 11.1304 cm-1

=====

7

TPSS/W-Iso/wisotp.log

Route: #P TPSS/TPSS/GenECP/Auto Freq

```

-----
W    0.711666    0.242375   -0.050990
H   -0.736985   -0.604432    0.702081
C   -0.148548   -0.198700   -1.867609
N    2.243174    1.029258   -0.786879
C    1.276071    0.548469    1.903190
O   -0.648945   -0.462251   -2.883147
O    3.233702    1.506598   -1.248356
O    1.568361    0.712965    3.016307
P    1.570897   -2.116079    0.064691
P   -0.690252    2.339652    0.101291
C    0.481680   -3.414569   -0.681932
H    0.925380   -4.419771   -0.573027
H    0.330253   -3.194901   -1.751610
H   -0.499102   -3.387564   -0.179748
C    3.186468   -2.411898   -0.790900
H    3.498192   -3.468105   -0.710497
H    3.085162   -2.135681   -1.853300
H    3.957090   -1.764686   -0.340728
C    1.882317   -2.813211    1.751912
H    2.222377   -3.862381    1.697481
H    0.951437   -2.757057    2.339814
H    2.649537   -2.205613    2.259282
C   -1.620533    2.588981    1.680080
H   -0.918628    2.566651    2.529859
H   -2.347543    1.768234    1.793315
H   -2.155874    3.554646    1.669782
C   -2.016472    2.571844   -1.166040
H   -1.568058    2.550482   -2.172979
H   -2.731607    1.737236   -1.069658
H   -2.542300    3.531533   -1.017589
C    0.302126    3.895481   -0.045548
H   -0.342252    4.789542    0.024216
H    0.830593    3.895192   -1.013095
H    1.056394    3.919903    0.758213
H   -2.357988   -0.453686    0.476683
O   -3.321219   -0.279387    0.351706
C   -3.955798   -1.506377   -0.064512
C   -3.873041   -2.570104    1.035910
C   -5.393491   -1.153747   -0.433610
H   -3.440695   -1.887899   -0.968524
H   -4.383737   -2.217355    1.949073
H   -2.820397   -2.785755    1.292213
H   -4.346408   -3.513744    0.708377
H   -5.924400   -0.747449    0.445179
H   -5.411080   -0.393494   -1.232380
H   -5.934416   -2.048428   -0.788454
-----

```

Energy E(RTPSS-TPSS) -1541.15143229 a.u.  
-4046293.09 kJ/mol

SCF Convergence: 0.8632D-08

Maximum Force: 0.000271

ZPE-correction : 0.363805 a.u.  
955.17 kJ/mol

Energy (298K) : -1540.756346 a.u.

Enthalpy (298K) : -1540.755402 a.u.

Free Energy (298K): -1540.854424 a.u.

Lowest Frequency 16.4767 cm<sup>-1</sup>

=====

4

TPSS/W-NO/wno.log

Route: #P TPSS/GenECP GFInput Freq

```

-----
W -1.693569  0.154672 -0.023028
H -3.050617  1.156071  0.687623
C -1.289196 -0.169041  1.971101
N -0.334958 -0.927171 -0.696692
C -2.443691  0.771977 -1.833803
O -1.102489 -0.319907  3.106101
O  0.532709 -1.662644 -1.113119
O -2.896780  1.147237 -2.837056
P -0.482459  2.369217  0.099903
P -3.522236 -1.565665  0.064639
C -1.566867  3.834138 -0.215995
H -2.023987  3.741029 -1.214653
H -2.373386  3.847717  0.534610
H -0.987305  4.772283 -0.163191
C  0.343591  2.830721  1.690586
H -0.394756  2.800946  2.508486
H  0.780814  3.842531  1.626890
H  1.142156  2.103655  1.907231
C  0.877921  2.588424 -1.132421
H  1.317247  3.598758 -1.058906
H  1.661315  1.833735 -0.954640
H  0.471194  2.437403 -2.145760
C -5.196411 -0.968756 -0.447337
C -3.879481 -2.354343  1.701073
C -3.255278 -3.032370 -1.032977
H -5.943887 -1.778795 -0.385012
H -5.490494 -0.136424  0.212177
H -5.148920 -0.591585 -1.481902
H -4.705391 -3.082883  1.623338
H -2.971984 -2.865191  2.062506
H -4.148984 -1.569822  2.427107
H -4.088131 -3.752839 -0.953196
H -3.163521 -2.688236 -2.076230
H -2.311051 -3.525815 -0.749868
H  2.136139 -0.878389 -1.248969
O  2.988530 -0.379090 -1.243557
C  3.841922 -0.943856 -0.280031
H  3.672582 -2.025672 -0.143124
C  5.285435 -0.794825 -0.800286
C  3.601240 -0.294918  1.103716
F  6.176794 -1.262611  0.103567
F  5.428777 -1.515282 -1.930681
F  5.600737  0.483010 -1.074944
F  4.354629 -0.859323  2.067966
F  3.837352  1.033154  1.104732
F  2.298301 -0.471725  1.446864
-----

```

Energy E(RTPSS-TPSS) -2136.18627706 a.u.  
-5608557.07 kJ/mol

SCF Convergence: 0.7007D-08

Maximum Force: 0.000489

ZPE-correction : 0.318297 a.u.  
835.69 kJ/mol

Energy (298K) : -2135.832874 a.u.

Enthalpy (298K) : -2135.831930 a.u.

Free Energy (298K): -2135.940551 a.u.

Lowest Frequency 14.9277 cm<sup>-1</sup>

=====

6

TPSS/W-Water/wwtp.log

Route: #P TPSS/TPSS/GenECP/Auto GFInput Opt(CalcFC) Freq

Atom Coordinates (x,y,z) in Angstrom

```

-----
W   -0.081293  -0.160093  -0.093379
H   -0.047901  1.187038   1.158762
C   -0.034632  1.334401  -1.508270
N   -0.213423  -1.550817  -1.340135
C   -0.091953  -1.396930   1.549374
O   -0.014049  2.191886  -2.292371
O   -0.322619  -2.439139  -2.127851
O   -0.091757  -2.073458   2.494917
P   -2.535732   0.270763   0.236672
P    2.442785  -0.135731   0.051106
C   -3.121182   1.987587  -0.136391
H   -4.200778   2.096742   0.067480
H   -2.923463   2.220342  -1.195615
H   -2.554816   2.698591   0.487136
C   -3.679009  -0.769831  -0.782384
H   -4.736580  -0.525620  -0.580043
H   -3.459590  -0.603854  -1.849860
H   -3.496190  -1.833056  -0.555926
C   -3.184836   0.020593   1.952951
H   -4.255885   0.280740   2.019860
H   -2.605917   0.652781   2.646025
H   -3.044605  -1.032779   2.246251
C    3.167291   0.028829   1.744991
H    2.766255  -0.765913   2.395147
H    2.883947   1.009838   2.160094
H    4.268093  -0.048945   1.706304
C    3.352698   1.170392  -0.888957
H    3.081075   1.108909  -1.955660
H    3.048827   2.153588  -0.492376
H    4.444451   1.046931  -0.778506
C    3.208711  -1.702074  -0.572440
H    4.309714  -1.666205  -0.496787
H    2.915342  -1.852973  -1.624280
H    2.826151  -2.551652   0.016833
H    0.988758   2.439404   1.267408
O    1.659182   3.152063   1.402071
H    1.148403   3.974594   1.364712
-----

```

```

Energy E(RTPSS-TPSS)  -1423.24506792 a.u.
                      -3736729.93 kJ/mol

```

SCF Convergence: 0.2892D-08

Maximum Force: 0.000176

```

ZPE-correction      :           0.279800 a.u.
                    :           734.61 kJ/mol

```

```

Energy (298K)       :   -1422.937743 a.u.
                    :   -3735923.04 kJ/mol

```

```

Enthalpy (298K)    :   -1422.936798 a.u.
                    :   -3735920.56 kJ/mol

```

```

Free Energy (298K) :   -1423.026669 a.u.
                    :   -3736156.52 kJ/mol

```

```

Lowest Frequency    8.6518 cm-1
=====

```



**WH(CO)<sub>2</sub>(NO)(PMe<sub>3</sub>)<sub>2</sub>**

TPSS/W/w.log

Route: #P TPSSTPSS/GenECP Freq

Atom Coordinates (x,y,z) in Angstrom

```

-----
W      0.000000    0.026710    0.030602
H      0.000058    0.034501   -1.797144
C     -0.000006    2.058923   -0.274578
C      0.000005   -2.008707   -0.221605
N     -0.000015    0.046549    1.907534
O      0.000023    3.196566   -0.514547
O     -0.000012   -3.155592   -0.424608
O     -0.000006    0.068895    3.101217
P      2.493377   -0.019126   -0.271624
P     -2.493376   -0.019117   -0.271628
C      3.087547   -0.777088   -1.851385
C      3.393249    1.600392   -0.255039
C      3.419991   -0.981087    1.012420
C     -3.393479    1.600247   -0.252950
C     -3.087475   -0.775167   -1.852335
C     -3.419830   -0.982832    1.011216
H      4.508326   -0.959826    0.826091
H      3.207710   -0.550443    2.004965
H      3.065832   -2.025050    1.006346
H      4.480589    1.459728   -0.386348
H      3.005152    2.238585   -1.066010
H      3.201075    2.106507    0.705438
H      4.190655   -0.786174   -1.902755
H      2.705511   -1.808728   -1.923178
H      2.677407   -0.199776   -2.695587
H     -4.190586   -0.784488   -1.903626
H     -2.677561   -0.196648   -2.695821
H     -2.705158   -1.806605   -1.925499
H     -4.480807    1.459580   -0.384347
H     -3.201299    2.105187    0.708143
H     -3.005542    2.239510   -1.063155
H     -4.508179   -0.961424    0.824984
H     -3.065580   -2.026755    1.003762
H     -3.207530   -0.553456    2.004308
-----

```

Energy E(RTPSS-TPSS) -1346.77048293 a.u.  
-3535945.90 kJ/mol

SCF Convergence: 0.4803D-08

&lt;S\*\*2&gt;: 0.0000

Charge: 0.0000

Maximum Force: 0.000133

ZPE-correction : 0.256056 a.u.  
672.28 kJ/mol

Energy (298K) : -1346.490258 a.u.  
-3535210.17 kJ/mol

Enthalpy (298K) : -1346.489314 a.u.  
-3535207.69 kJ/mol

Free Energy (298K): -1346.569818 a.u.  
-3535419.06 kJ/mol

Lowest Frequency 21.8402 cm-1  
=====

O-H bond lengths (in pm) of isopropanol and HFIP in compounds 1, 2, 3, 3', 4 and 5:

|             | BP86 | PBE  | B3LYP | TPSS |
|-------------|------|------|-------|------|
| Isopropanol | 97.3 | 97.2 | 96.3  | 97.1 |
| HFIP        | 97.4 | 97.3 | 96.4  | 97.2 |
| 1           | 99.8 | 99.7 | 98.1  | 99.3 |
| 2           | 103  | 103  | 100   | 102  |
| 3           | 100  | 100  | 98.7  | 99.9 |
| 3'          | 101  | 101  | 99.0  | 100  |
| 4           | 99.2 | 99.0 | 98.7  | 98.8 |
| 5           | 98.1 | 98.0 | 96.9  | 97.8 |
